# Supplementary material
Source: PubMed Central journal article supplement (PMC2230554)
Supplement: plntphys_pp.107.108597_1.pdf [file plntphys_pp.107.108597_1.pdf]

**Figure 1S.** Alignment of *CesA* cDNAs and gene family member-specific 3'-anchored 454-sequence-reads.

|     |             |                        |     |                                                               |
|-----|-------------|------------------------|-----|---------------------------------------------------------------|
| lcl | TC300086_UP | Q9LLI4_MAIZE (CesA6)_  | 1   | -----G                                                        |
| lcl | TC280752_UP | Q9LLI2_MAIZE (CesA8)_  | 1   | -----CACAGCTCATATACCAAGAGCCGGAG                               |
| lcl | TC295737_UP | Q6UDF1_MAIZE (CesA10)_ | 1   | -----                                                         |
| lcl | TC287832_UP | Q9LLI6_MAIZE (CesA4)_  | 1   | CTAGGATCAAACCGTCTCGCCGCTGCAATAATCTTTTGTCAATTCTTAATCCCTCGCGT   |
| lcl | TC287831_UP | Q9LLI1_MAIZE (CesA9)_  | 1   | -----                                                         |
| lcl | TC299205_UP | Q9LLI5_MAIZE (CesA5)_  | 1   | -----                                                         |
| lcl | TC311277_UP | Q9LLI8_MAIZE (CesA2)_  | 1   | -----                                                         |
| lcl | TC294544_UP | Q9LLI9_MAIZE (CesA1)_  | 1   | -----                                                         |
|     |             |                        |     |                                                               |
| lcl | TC300086_UP | Q9LLI4_MAIZE (CesA6)_  | 2   | CA-CGAGCGCGCGCCAGGCGCAACGCAACAAAGGAAACCACCGGGAGGAGAAA         |
| lcl | TC280752_UP | Q9LLI2_MAIZE (CesA8)_  | 27  | CAGCTTACCGAGCCAGAGCGGCGCGGCGCAACACAAACCCACCCCGCCACAGCGGC      |
| lcl | TC295737_UP | Q6UDF1_MAIZE (CesA10)_ | 1   | -----                                                         |
| lcl | TC287832_UP | Q9LLI6_MAIZE (CesA4)_  | 61  | CGACAGCACAGCGGGAACCAACTCAGCTTCCCGCGGTTCTCCATCGGTGCGGTGCCCT    |
| lcl | TC287831_UP | Q9LLI1_MAIZE (CesA9)_  | 1   | -----CAACTCAGCTTCCCGCGGTTCTCCATCGGTGCGGTGCCCT                 |
| lcl | TC299205_UP | Q9LLI5_MAIZE (CesA5)_  | 1   | -----CCTCGAGCGAGCTCCACCACTTGTCTCTGCGGAGG--T                   |
| lcl | TC311277_UP | Q9LLI8_MAIZE (CesA2)_  | 1   | -----GCAGCAGCAACCACACTCCGCGGCATTGCAGCGAGCAAGCGGGAGGGATCTG     |
| lcl | TC294544_UP | Q9LLI9_MAIZE (CesA1)_  | 1   | -----AGCAGCAGAACCACTCCGCGGCATTGCAGCGATCAGCGGGAGGAATTG         |
|     |             |                        |     |                                                               |
| lcl | TC300086_UP | Q9LLI4_MAIZE (CesA6)_  | 61  | AGCTAGCAGCGTCTCCCTCCCTCCCTCACTCCCGTT----TGATTGCATTCCCCCC      |
| lcl | TC280752_UP | Q9LLI2_MAIZE (CesA8)_  | 87  | -GTGCGCATCTGAGCGGTCCCGCGCGCCGGAGACCCAGA----GGAGGGGAGGACTACG   |
| lcl | TC295737_UP | Q6UDF1_MAIZE (CesA10)_ | 1   | -----S                                                        |
| lcl | TC287832_UP | Q9LLI6_MAIZE (CesA4)_  | 121 | GTCCTTTTCTCTCT--CCCTCCTCCCGCGTATAGTTAAGCCCGCCCGCTACTACTAC     |
| lcl | TC287831_UP | Q9LLI1_MAIZE (CesA9)_  | 43  | GTCCTTTTCTCTC----CTCCACCTCCCTAGTCCCTC--CTCCCGCCCGCTCATAGC     |
| lcl | TC299205_UP | Q9LLI5_MAIZE (CesA5)_  | 38  | GAACACTGCGTTAG--GCCACTGCCACCGGTGGGCTGC----CTCTGCCTTGCCTC      |
| lcl | TC311277_UP | Q9LLI8_MAIZE (CesA2)_  | 56  | GGGCATGTGCGCTCCCTCCCGCTCCCGTCCGATCTA--GAGGGCCGACGGGCTGATT     |
| lcl | TC294544_UP | Q9LLI9_MAIZE (CesA1)_  | 51  | GGGCATGTGGT----CGCCAACCGCTCGGATCTA--GAGGGCCGACGGGCGGATT       |
|     |             |                        |     |                                                               |
| lcl | TC300086_UP | Q9LLI4_MAIZE (CesA6)_  | 116 | CAGACGCGCGTA--CGCGCGCGCCGCAACCA--CGCTTGCCTCCGGATCTGGAGATCTG   |
| lcl | TC280752_UP | Q9LLI2_MAIZE (CesA8)_  | 141 | TGCATTTTCTCTGCGCCCGCCCGCGGTTCC--TGCCGAGC--CAGATCCGGCGGGCGG    |
| lcl | TC295737_UP | Q6UDF1_MAIZE (CesA10)_ | 2   | UBUNITCMPLTECTCCGCCACAGCCCGCTCGCTCCGTCGGCAATC----GGCATG       |
| lcl | TC287832_UP | Q9LLI6_MAIZE (CesA4)_  | 180 | TACTAGCAGCAGAGCGCTCTCGCAGCGGAGATGCAGTGTGATCCGTCGCC--GCTCG     |
| lcl | TC287831_UP | Q9LLI1_MAIZE (CesA9)_  | 96  | TACTACTAGTAGACACCGCTCGCAGCGGAGATGCAGTGTGATCCGTCGCCCTGCTCG     |
| lcl | TC299205_UP | Q9LLI5_MAIZE (CesA5)_  | 90  | TCCCGCCAGCG--CGCGCGCCGG--GGCGATTCGCGCGCCGACCGCG--GAGG         |
| lcl | TC311277_UP | Q9LLI8_MAIZE (CesA2)_  | 115 | GCCCTCCCGCGGCTCCGTTGCTGGTG----GAGTGTGAATCGGTGTGTGATAGGAG      |
| lcl | TC294544_UP | Q9LLI9_MAIZE (CesA1)_  | 104 | GCTCTCCCGCGGCTCCGTTGCTGGTCTCGTTCGCTGCTGAGCCGCTCTCGGTGCGAG     |
|     |             |                        |     |                                                               |
| lcl | TC300086_UP | Q9LLI4_MAIZE (CesA6)_  | 172 | GTAGCGCAGG----GGGATGGAAGCCAGCGCGGGCTGCT--GCCGGCTCGCACAAAC     |
| lcl | TC280752_UP | Q9LLI2_MAIZE (CesA8)_  | 198 | G--GGCGGGGGG--CTCAGATGGAAGGCTAGCGGGGGCTGCTG--GCCGGCTCGCATTAAC |
| lcl | TC295737_UP | Q6UDF1_MAIZE (CesA10)_ | 58  | G--ACGCGGCT--C-----GGTCAACGGTGGCTCC--GCGGGCTCGCACATG          |
| lcl | TC287832_UP | Q9LLI6_MAIZE (CesA4)_  | 239 | GATCTCGGACTGCTGCGGCTC--TCCCAGGCCCGCGGCTCCAGCCAGCTCCCTCAG      |
| lcl | TC287831_UP | Q9LLI1_MAIZE (CesA9)_  | 156 | GATCTCGGAGTGTGCGGACTTGTCTCCCTTCCGCTCTGCTAGGCCAGCTCTT--CTC     |
| lcl | TC299205_UP | Q9LLI5_MAIZE (CesA5)_  | 141 | GAAGCCAGGATCGGCTGATC--GGCGGGTCCCGGCTT--GTGAATCTGTC--GAG       |
| lcl | TC311277_UP | Q9LLI8_MAIZE (CesA2)_  | 169 | GAGCG--G--CGAGATGGCGGCCAACAGGGGATGGTG--GCAGGCTTCAACAC         |
| lcl | TC294544_UP | Q9LLI9_MAIZE (CesA1)_  | 164 | CAGCGGGAGGAGCGGAGATGGCGGCCAACAGGGGATGGTG--GCGGGCTCGCACAAAC    |
|     |             |                        |     |                                                               |
| lcl | TC300086_UP | Q9LLI4_MAIZE (CesA6)_  | 225 | CGGAACGAGCTCTCTCATCCGCGCG--ATGGCGAGCGAG--GCCGAA----GCCCAT     |
| lcl | TC280752_UP | Q9LLI2_MAIZE (CesA8)_  | 253 | CGGAACGAGCTGTGGTATCCGCGCG--ACCGGAGTCCGGAGCGCGG--GGCGGC        |
| lcl | TC295737_UP | Q6UDF1_MAIZE (CesA10)_ | 103 | CGGACGAGCTGCATGTATGCGCGCC--CGCAGGAGCGAAGCCAG--GTCCGG          |
| lcl | TC287832_UP | Q9LLI6_MAIZE (CesA4)_  | 298 | GTTTCTCGCGGAGC--TCGCTTCCATGGAAGGGCGAGCGGAGCGGTC--AAGTCGGG     |
| lcl | TC287831_UP | Q9LLI1_MAIZE (CesA9)_  | 215 | GGTCTGCGGAGC--TCGCTTCCATGGAAGGGCGAGCGGAGCGGTC--AAGTCGGG       |
| lcl | TC299205_UP | Q9LLI5_MAIZE (CesA5)_  | 196 | GGTC--GGAT--TGGTCCGCAATGACGGCGGCG--ACGCCAGC--AATTCGGG         |
| lcl | TC311277_UP | Q9LLI8_MAIZE (CesA2)_  | 218 | CGCAACGAGTCTCTCATGATCCGCGCG--ACGGCGAGCGGCTGTCCCGGCTAAGCCAC    |
| lcl | TC294544_UP | Q9LLI9_MAIZE (CesA1)_  | 222 | CGCAACGAGTCTCTCATGATCCGCGCG--ACGGCGATCTGCGCGGCTCCGCTAAGCCAC   |
|     |             |                        |     |                                                               |
| lcl | TC300086_UP | Q9LLI4_MAIZE (CesA6)_  | 278 | GGACAGCGGACGGCCAGG----TGTGCCAGATTTGCGGCGACGACGTGGCGCGAC       |
| lcl | TC280752_UP | Q9LLI2_MAIZE (CesA8)_  | 307 | GGCGCGCGCGCGCGGGCGGAGGGCGCGTGCAGATATGCGGCGACGAGGTCCGGCTGGGC   |
| lcl | TC295737_UP | Q6UDF1_MAIZE (CesA10)_ | 157 | AGCGC--CGACGTGAGA----CGTGCCCTGTGCGCCGACGAGGTCCGGACCGGG        |
| lcl | TC287832_UP | Q9LLI6_MAIZE (CesA4)_  | 353 | GAGCGCGGTCGCGGACAGG----TGTGCCAGATCTGCGGCGACGCGTGGGCACACCG     |
| lcl | TC287831_UP | Q9LLI1_MAIZE (CesA9)_  | 270 | GAGCGCGGCGGAGGGCAGG----TGTGCCAGATCTGCGGCGATGCGGCGGACACTACG    |
| lcl | TC299205_UP | Q9LLI5_MAIZE (CesA5)_  | 243 | GAAGCATGCGCGGGCAGG----TGTGCCAGATCTGCGGCGACGCGTGGGCACCGCG      |
| lcl | TC311277_UP | Q9LLI8_MAIZE (CesA2)_  | 277 | GAAGCATGCGGATGGGCAGG----TGTGCCAGATTTGTGGCGACACTGTGGCGTTTCA    |
| lcl | TC294544_UP | Q9LLI9_MAIZE (CesA1)_  | 281 | GAAGCATGCGGATGGGCAGG----TGTGCCAGATTTGCGGCTGACTCTGTGGGTGTTTCA  |

lcl|TC300086\_UP|Q9LLI4\_MAIZE (CesA6)\_ 333 GCGAGGGGGAGCCGTTTCGTGCGCTGCAACGAGTGCCTTTCCCGTCTGCGCGGACTGCG  
lcl|TC280752\_UP|Q9LLI2\_MAIZE (CesA8)\_ 367 TTCGACGGGGAGCCCTTCGTGCGTGCAACGAGTGCCTTTCCCGTCTGCGCGCGCTGCG  
lcl|TC295737\_UP|Q6UDF1\_MAIZE (CesA10)\_ 208 GAGGACGGGCGAGCCCTTCGTGCGTGCGCGAGTGCCTTTCCCGTCTGCGCGCGCTGCG  
lcl|TC287832\_UP|Q9LLI6\_MAIZE (CesA4)\_ 408 GCGGAGGGGGAGCTTCTTCGCGCCTGCGACGTGTGCGGGTTTCCGCTGTGCGCGCGCTGCG  
lcl|TC287831\_UP|Q9LLI1\_MAIZE (CesA9)\_ 325 GCGGAGGGAGACTCTTCACCGCCTGCGACGTGTGCGGGTTTCCGCTGTGCGCGCGCTGCG  
lcl|TC299205\_UP|Q9LLI5\_MAIZE (CesA5)\_ 298 GCGGAGGGGAGCTTCTTCACCGCCTGCGACGTGTGCGGGTTTCCGCTGTGCGCGCGCTGCG  
lcl|TC311277\_UP|Q9LLI8\_MAIZE (CesA2)\_ 332 GCCACTGGTGCATCTTTTGTTCCTGCAATGAGTGTGCTTTCCCGTCTGCGCGCGCTGCG  
lcl|TC294544\_UP|Q9LLI9\_MAIZE (CesA1)\_ 336 GCCACTGGTGCATCTTTTGTTCCTGCAATGAGTGTGCTTTCCCGTCTGCGCGCGCTGCG

lcl|TC300086\_UP|Q9LLI4\_MAIZE (CesA6)\_ 393 TACGAGTACGAGCGCCGCGAGGGCCAGCAGAACGCCCCAGTGCAGAGACCCTTCAAG  
lcl|TC280752\_UP|Q9LLI2\_MAIZE (CesA8)\_ 427 TACGAGTACGAGCGCCGCGAGGGCTCGCAGGCTGCCCCGAGTGCAGAGACCCTTCAAG  
lcl|TC295737\_UP|Q6UDF1\_MAIZE (CesA10)\_ 268 TACGAGTACGAGCGCAGCGAGGGCCAGCAGTGTGCCCCGAGTGCAGAGACCCTTCAAG  
lcl|TC287832\_UP|Q9LLI6\_MAIZE (CesA4)\_ 468 TACGAGTACGAGCGCAAGGACGGCAGCAGGCTGCCCCAGTGCAGAGACCCTTCAAG  
lcl|TC287831\_UP|Q9LLI1\_MAIZE (CesA9)\_ 385 TACGAGTACGAGCGCAAGGACGGCAGCAGGCTGCCCCAGTGCAGAGACCCTTCAAG  
lcl|TC299205\_UP|Q9LLI5\_MAIZE (CesA5)\_ 358 TACGAGTACGAGCGCAAGGACGGCAGCAGGCTGCCCCGAGTGCAGAGACCCTTCAAG  
lcl|TC311277\_UP|Q9LLI8\_MAIZE (CesA2)\_ 392 TATGAGTACGAGCGCAAGGACGGCAGCAGTGTGCCCCGAGTGCAGAGACCCTTCAAG  
lcl|TC294544\_UP|Q9LLI9\_MAIZE (CesA1)\_ 396 TATGAGTACGAGCGCAAGGAGGGCAGCAGTGTGCCCCGAGTGCAGAGACCCTTCAAG

lcl|TC300086\_UP|Q9LLI4\_MAIZE (CesA6)\_ 453 CGCCCTCAAGGGGTCGCGCGCTGCCCGGGGACGAGGAGGAGGACGGCTCGACGACCTG  
lcl|TC280752\_UP|Q9LLI2\_MAIZE (CesA8)\_ 487 CGCCCTCAAGGGCTGCCCGCGGTTGCCCGGACGAGGAGGAGGACGGCTCGACGACCTG  
lcl|TC295737\_UP|Q6UDF1\_MAIZE (CesA10)\_ 328 CGCCCAAGGGGTCGCGCGGTTGCAAGGGGACGAGGAGGAGGCTCGGAGAT---CGGAGAT---  
lcl|TC287832\_UP|Q9LLI6\_MAIZE (CesA4)\_ 528 CGCCCAAGGGGAGCCCGCGGATCCCTGGGGAGGAGGAGACGACTCTGATGCGGAT---  
lcl|TC287831\_UP|Q9LLI1\_MAIZE (CesA9)\_ 445 CGCCCAAGGGGAGTCCAGCGATCCAGGGGAGGAGGAGACGACTCTGATGCGGATGAT  
lcl|TC299205\_UP|Q9LLI5\_MAIZE (CesA5)\_ 418 CGCCCAAGGGGAGCCCGCGGATCCAGTACAGGCTGAGGAAATGAGGATGCGGATGCGGAT  
lcl|TC311277\_UP|Q9LLI8\_MAIZE (CesA2)\_ 452 AGACAGAAAGGTAGCCCTCGAGTTCATGCTGATGATGAGGAGGAGATGTTGATGACCTG  
lcl|TC294544\_UP|Q9LLI9\_MAIZE (CesA1)\_ 456 AGACAGAAAGGTAGCCCTCGAGTTCATGCTGATGAGGATGAGGAGATGTTGATGACCTA

lcl|TC300086\_UP|Q9LLI4\_MAIZE (CesA6)\_ 513 GAGAACGAGTTCACATGGAG-----GACAAA-----GCAGGACTCCAGT  
lcl|TC280752\_UP|Q9LLI2\_MAIZE (CesA8)\_ 547 GAGGCGGAGTTCGCGCTGCAGGACGGCGCCCCCAAG-----GGAGGACCCGAGT  
lcl|TC295737\_UP|Q6UDF1\_MAIZE (CesA10)\_ 381 --GGACGACTTC-----A-----GGACCA-----GT  
lcl|TC287832\_UP|Q9LLI6\_MAIZE (CesA4)\_ 585 --AGCGACTTCAATTCCTTGCATCTGGCAATGAGGACCCAGAAGCAGAGATGCGGAC  
lcl|TC287831\_UP|Q9LLI1\_MAIZE (CesA9)\_ 505 GCTAGCGACTTCAACTACCTGCACTCTGGCAATGACGACCAGAAGCAGAGATGCTGAC  
lcl|TC299205\_UP|Q9LLI5\_MAIZE (CesA5)\_ 478 GTGACTGACTTCAACTACCAAGCACTTGGCAACGAGGATCAGAAGCAGAGATGCTGAG  
lcl|TC311277\_UP|Q9LLI8\_MAIZE (CesA2)\_ 512 GACAAATGAATTCAACTAT--AAGCAA--GGCAATGGG-----AAGGCC-----C  
lcl|TC294544\_UP|Q9LLI9\_MAIZE (CesA1)\_ 516 GACAAATGAATTCAACTAC--AAGCAA--GGCAGTGGG-----AAGGCC-----C

lcl|TC300086\_UP|Q9LLI4\_MAIZE (CesA6)\_ 553 ACCTGCGCGAGTCCATGCTCCACGCGCAGATGAGCTAGCGCGCGCGCGGACCTCGACG  
lcl|TC280752\_UP|Q9LLI2\_MAIZE (CesA8)\_ 599 ACCTGCGCGAGTCCATGCTCCAGGCGCGAGATGAGCTAGCGCGCGCGCGGAC-----  
lcl|TC295737\_UP|Q6UDF1\_MAIZE (CesA10)\_ 401 TCCCGCCAG-----AGCCCAAGAACCTCA-----CGA-----  
lcl|TC287832\_UP|Q9LLI6\_MAIZE (CesA4)\_ 642 AGAATGCGCAGCTGGCGCATGAACGTTGGGGCAGCGGGATGTTGGTGGCCCAAGTAT  
lcl|TC287831\_UP|Q9LLI1\_MAIZE (CesA9)\_ 565 AGAATGCGCAGCTGGCGCATGAATGCTGGGGCAGCGGGATGTTGGCCGCCCAAGTAT  
lcl|TC299205\_UP|Q9LLI5\_MAIZE (CesA5)\_ 538 AGAATGCTTCACTTGGCGGACAACTGACCTGGCAGT---GATATTGGCTGGCTAAGTAT  
lcl|TC311277\_UP|Q9LLI8\_MAIZE (CesA2)\_ 553 AGAGTG--GCAGCTT-----CAAGGAGAT---GACGCTGATCTGTCTTCTCT  
lcl|TC294544\_UP|Q9LLI9\_MAIZE (CesA1)\_ 557 AGAGTG--GCAACTG-----CAAGGAGAT---GATGCTGATCTGTCTTCTCT

lcl|TC300086\_UP|Q9LLI4\_MAIZE (CesA6)\_ 613 G-----CGTCCCAGCCCA--TTCCATCCCATCCCCA-----ATCTT  
lcl|TC280752\_UP|Q9LLI2\_MAIZE (CesA8)\_ 652 G-----CGCACCCCGGC---TTCAGCCCCGTCCCCA-----ACGTG  
lcl|TC295737\_UP|Q6UDF1\_MAIZE (CesA10)\_ 432 G-----CTGTTCGCG---TTCGACGTC-TACTCG-----GAGAA  
lcl|TC287832\_UP|Q9LLI6\_MAIZE (CesA4)\_ 702 GACAGTGGCGAGATCGGGCTTACCAAGTATGACAGTGGCGAGATTCCTCGGGGATACATC  
lcl|TC287831\_UP|Q9LLI1\_MAIZE (CesA9)\_ 625 GACAGTGGTGGAGATCGGGCTTACCAAGTACGACAGTGGTGGATCCCTCGGGGATACATC  
lcl|TC299205\_UP|Q9LLI5\_MAIZE (CesA5)\_ 595 GACAGCGGTGAATTTGGGCAATGGGAAGTATGACAGTGGTGGATCCCTCGTGGATATATC  
lcl|TC311277\_UP|Q9LLI8\_MAIZE (CesA2)\_ 596 G-----CTGCCATGACCCACACCTTCG--GATTCC-----ACGCC  
lcl|TC294544\_UP|Q9LLI9\_MAIZE (CesA1)\_ 600 G-----CTGCCATGACCCACATCTCCG--GATTCC-----ACGCC

lcl|TC300086\_UP|Q9LLI4\_MAIZE (CesA6)\_ 648 CCCCTCCACCAACGCAAGATGTCGATGACATCCCGGCCGACGAGCACGCCCTTGTG  
lcl|TC280752\_UP|Q9LLI2\_MAIZE (CesA8)\_ 685 CCGCTCCACCAACGCGCCAGATGTTGATGACATCCCGGCCGAGGAGACGCGCTCTGTG  
lcl|TC295737\_UP|Q6UDF1\_MAIZE (CesA10)\_ 462 CGCGAGCACCGCGCCAGAAATGCGGGACGG-----GTGGCCAGACGC-----TG  
lcl|TC287832\_UP|Q9LLI6\_MAIZE (CesA4)\_ 762 CCATCAGTCACTAACAGCCAGATCTCAGGAGAAATCCC--TGGTCTTCCCCTGACCATC  
lcl|TC287831\_UP|Q9LLI1\_MAIZE (CesA9)\_ 685 CCGTCACTCACTAACAGCCAGATTTCCGGAGAAATCCC--TGGTCTTCCCCTGACCATC  
lcl|TC299205\_UP|Q9LLI5\_MAIZE (CesA5)\_ 655 CCGTCACTCACTAACAGCCAGATCTCAGGAGAGATTC--TGGAGCTTCCCCTGA---TC  
lcl|TC311277\_UP|Q9LLI8\_MAIZE (CesA2)\_ 630 TTCAAGTGCACAA---CAGATATCTGGAGAGATCCC--TGATGCTTCCCCTGACCGTCT  
lcl|TC294544\_UP|Q9LLI9\_MAIZE (CesA1)\_ 634 TGCAAGCGCTCAA---CAGATATCTGGAGAGATCCC--TGATGCTTCCCCTGACCGTCT

|     |             |                       |      |                                                                |
|-----|-------------|-----------------------|------|----------------------------------------------------------------|
| lcl | TC300086_UP | Q9LLI4_MAIZE (CesA6)  | 708  | CCCTGCTTCTG-----GGTGGCGGGGGCAAGAGGATTCAACCTCTCCGGTACCG         |
| lcl | TC280752_UP | Q9LLI2_MAIZE (CesA8)  | 745  | CCGTCTTACATAGCGGGCGGGCGCGGGCAAGAGGATCCACCCGCTCCCTTTGCGA        |
| lcl | TC295737_UP | Q6UDF1_MAIZE (CesA10) | 508  | TCGTCTTACC-----GGAGCGTGGCGGGAGGA-----CCTGGAGCGC                |
| lcl | TC287832_UP | Q9LLI6_MAIZE (CesA4)  | 820  | ATATGATGTC-----CCCAACTGGGAACATTGGCAAGCGTGTC---TCCATTTCCCTATGTG |
| lcl | TC287831_UP | Q9LLI1_MAIZE (CesA9)  | 743  | ATATGATGTC---TCCTACTGGGAACATTGGCAGGGCGC---CCCATTTCCCTATATG     |
| lcl | TC299205_UP | Q9LLI5_MAIZE (CesA5)  | 710  | ATATGATGTC---TCCTGTTGGGAACATTGGCAGGGCTGACATCAAITTCCCTATGTAT    |
| lcl | TC311277_UP | Q9LLI8_MAIZE (CesA2)  | 684  | ATTCTATCCGCA-GTCCAACATCGAGCTATGTTGATCCAGCGTTCCAGTTCC-TGTGAG    |
| lcl | TC294544_UP | Q9LLI9_MAIZE (CesA1)  | 688  | ATTCTATCCGCA-GTCCAACATCGAGCTATGTTGATCCAGCGTTCCAGTTCC-TGTGAG    |
|     |             |                       |      |                                                                |
| lcl | TC300086_UP | Q9LLI4_MAIZE (CesA6)  | 759  | GATCCCAACCTTCTGTGCAACCGAGGCTATGGACCTTCCAAAGGATCTCCCGCAATAT     |
| lcl | TC280752_UP | Q9LLI2_MAIZE (CesA8)  | 805  | GATCCCAACCTTCCAGTGAACCGGATCATGGACCCGTCGAAGGATCTGCGCGCTAC       |
| lcl | TC295737_UP | Q6UDF1_MAIZE (CesA10) | 550  | GA-----GAGGGAGATGGAG-----                                      |
| lcl | TC287832_UP | Q9LLI6_MAIZE (CesA4)  | 873  | AATC-----ATTGCCAAATCCGTCAAGGGAGTT---CTCTGGT                    |
| lcl | TC287831_UP | Q9LLI1_MAIZE (CesA9)  | 796  | AATC-----ATTCACTAAATCCGTGAGGGAAT---CTCTGGT                     |
| lcl | TC299205_UP | Q9LLI5_MAIZE (CesA5)  | 766  | AATC-----ATTCTCAAACCCATCGAGGGAGTT---CTCCGGT                    |
| lcl | TC311277_UP | Q9LLI8_MAIZE (CesA2)  | 742  | GATT-----GT---GGACCCCTCGAAGGACTTGAATTCCTAT                     |
| lcl | TC294544_UP | Q9LLI9_MAIZE (CesA1)  | 746  | GATT-----GT---GGACCCCTCGAAGGACTTGAATTCCTAT                     |
|     |             |                       |      |                                                                |
| lcl | TC300086_UP | Q9LLI4_MAIZE (CesA6)  | 819  | GGCTACGGGAGCTAGCATGGAAGGAGAGGATCGAGAGCTGGAAGCAGAAGCAGGA---G    |
| lcl | TC280752_UP | Q9LLI2_MAIZE (CesA8)  | 865  | GGATATGGCAGCCTGGCCTGGAAGGAGACAATCGAGCGCTGGAAGCAGAAGCAGGA---G   |
| lcl | TC295737_UP | Q6UDF1_MAIZE (CesA10) | 565  | -----GGGAGCTGAGTGGGAAGGACCGGATCGACAAGTGGGAAGACCAGCAGGA---G     |
| lcl | TC287832_UP | Q9LLI6_MAIZE (CesA4)  | 909  | AGCATTTGGGAATGTTGCTTGGAAAAGAGAGGGTTGATCGCTGGAAATGAAGCAGGACAAG  |
| lcl | TC287831_UP | Q9LLI1_MAIZE (CesA9)  | 832  | AGCCTTGGGAATGTTGCTTGGAAAAGAGAGGGTTGATCGCTGGAAATGAAGCAGGACAAG   |
| lcl | TC299205_UP | Q9LLI5_MAIZE (CesA5)  | 802  | AGCCTTGGCAATGTTGCTTGGAAAAGAGAGGGTTGATCGCTGGAAAATGA---AGGATAAA  |
| lcl | TC311277_UP | Q9LLI8_MAIZE (CesA2)  | 776  | GGGCTTAAATAGTGTGACTGGAAGGAAAGAGTTGAGAGCTGGAGGTTTAAACAGGACAAA   |
| lcl | TC294544_UP | Q9LLI9_MAIZE (CesA1)  | 780  | GGGCTTAAATAGTGTGACTGGAAGGAAAGAGTTGAGAGCTGGAGGTTTAAACAGGACAAA   |
|     |             |                       |      |                                                                |
| lcl | TC300086_UP | Q9LLI4_MAIZE (CesA6)  | 876  | AGGATGCACAGACAAAGAAC-----GATGGCGCGGG-----                      |
| lcl | TC280752_UP | Q9LLI2_MAIZE (CesA8)  | 922  | CGCTGCGACCATCTCAGAGC-----GAGGGTGGCGGT-----                     |
| lcl | TC295737_UP | Q6UDF1_MAIZE (CesA10) | 616  | AAGAGGGCAAGCTCAACCAC-----GACACACGCCAC-----                     |
| lcl | TC287832_UP | Q9LLI6_MAIZE (CesA4)  | 969  | GGGACGATTTCCATGACGAATGGCACAAACATTGCTCCCTCTGAGGGTGGGGTGTGGT     |
| lcl | TC287831_UP | Q9LLI1_MAIZE (CesA9)  | 892  | GGACCAATTTCCATGACGAATGGCACAAACATTGCTCCCTCTGAGGGTGGGGTGTGGT     |
| lcl | TC299205_UP | Q9LLI5_MAIZE (CesA5)  | 859  | GGTCAATTTCCATGACCAATGGAACAAACATTGCTCCATCAGAGGGGTGGAGTTGCT      |
| lcl | TC311277_UP | Q9LLI8_MAIZE (CesA2)  | 836  | AATATGTTCAACTGACTAAT---AAATATC---CAGAGGCTGAGGAG---A            |
| lcl | TC294544_UP | Q9LLI9_MAIZE (CesA1)  | 840  | AATATGATCAAGTGACTAAT---AAATATC---CAGAGGCTGAGGAG---A            |
|     |             |                       |      |                                                                |
| lcl | TC300086_UP | Q9LLI4_MAIZE (CesA6)  | 910  | -AC---GA-----TGCTGATGATGCAGATCTAC---CACTAATGGATGAAGCTTGA       |
| lcl | TC280752_UP | Q9LLI2_MAIZE (CesA8)  | 956  | -ATTGGGA-----TGCGGACGATGCAGATCTGC---CACTAATGGATGAAGCTTGG       |
| lcl | TC295737_UP | Q6UDF1_MAIZE (CesA10) | 650  | -ACGACGA-----CGCAACCAACGAGACGATACATCTGCTTGGCGAGCCCGA           |
| lcl | TC287832_UP | Q9LLI6_MAIZE (CesA4)  | 1029 | GATATTGATGCATCACTGATTAACAACATGGAAGATCCCTATTGAACGACGAAACTCGA    |
| lcl | TC287831_UP | Q9LLI1_MAIZE (CesA9)  | 952  | GATATTGATGCATCACTGATTAACAACATGGAAGATCCCTATTGAACGATGAAACTCGC    |
| lcl | TC299205_UP | Q9LLI5_MAIZE (CesA5)  | 919  | GATATTGATGCTTCTACTGATATAACATGGAAGATCCCTACTGAAATGATGAAACTCGC    |
| lcl | TC311277_UP | Q9LLI8_MAIZE (CesA2)  | 879  | -ACATGGAGGG---GACTGCTCAAATGAGAAAGATATGCAATGTTGATGATGCACGC      |
| lcl | TC294544_UP | Q9LLI9_MAIZE (CesA1)  | 885  | GACATGGAGGG---GACTGCTCAAATGAGAAATATGCAATGTTGATGATGCACGC        |
|     |             |                       |      |                                                                |
| lcl | TC300086_UP | Q9LLI4_MAIZE (CesA6)  | 954  | CAGCCATTTGCCAGAAAGATCCCGCTTCTTCAAGCCAAATCAACCCCTATAGGATGATT    |
| lcl | TC280752_UP | Q9LLI2_MAIZE (CesA8)  | 1003 | CAGCCATTTGCCAGAAAGTCCCTATATCATCAAGCCCAATTAATCCCTACAGGATGATT    |
| lcl | TC295737_UP | Q6UDF1_MAIZE (CesA10) | 700  | CAGCCGCTGTGGCCAAAGTTCCCATCCGCTCGAGCATGATCAACCCTGATCCGATCTC     |
| lcl | TC287832_UP | Q9LLI6_MAIZE (CesA4)  | 1089 | CAGCCTCTATCTAGGAAAGTCCCACTTCTTCTCCAGGATAAATCCATACAGGATGGTC     |
| lcl | TC287831_UP | Q9LLI1_MAIZE (CesA9)  | 1012 | CAGCCTCTATCTAGGAAAGTCCCACTTCTTCTCCAGGATAAATCCATACAGGATGGTC     |
| lcl | TC299205_UP | Q9LLI5_MAIZE (CesA5)  | 979  | CAACCTCTATCTAGAAAGTGCCCAATTCCTTCAATCCAGAAATTAATCCGTACAGATGGTG  |
| lcl | TC311277_UP | Q9LLI8_MAIZE (CesA2)  | 935  | CTACCTTTGAGCGCAATTTGCCAATTTCTCAAACCGCTCAAAGCTTTACCGGATAGTA     |
| lcl | TC294544_UP | Q9LLI9_MAIZE (CesA1)  | 942  | CTACCTTTGAGCGCTATCTGTCGCAATTTCTCAAACCGCTCAAAGCTTTACCGGATAGT    |
|     |             |                       |      |                                                                |
| lcl | TC300086_UP | Q9LLI4_MAIZE (CesA6)  | 1014 | ATAATTAATTCGGCTAGTGGTTTGTGTTTCTTCTTCCACTACCGAGTGATGCATCCGGTG   |
| lcl | TC280752_UP | Q9LLI2_MAIZE (CesA8)  | 1063 | ATCGTTATCCGTTGTTGGTTTGTGCTTTCTTCTTCCACTACCGAGTGATGCATCCGGTG    |
| lcl | TC295737_UP | Q6UDF1_MAIZE (CesA10) | 760  | ATCGTGCTCCGCTGGTGGTCTCTGCTTCTTCTCAAGTTCGGATCAGCAGCCCGCC        |
| lcl | TC287832_UP | Q9LLI6_MAIZE (CesA4)  | 1149 | ATTGTGCTCCGATGATTTGTTCTAACCATCTTCTTGGACTACCGTATCACAAATCCTGTG   |
| lcl | TC287831_UP | Q9LLI1_MAIZE (CesA9)  | 1072 | ATTGTGCTCCGATGATTTGTTCTAACCATCTTCTTGGACTACCGATCACAAATCCTGTG    |
| lcl | TC299205_UP | Q9LLI5_MAIZE (CesA5)  | 1039 | ATTGTGCTACGTTTGGCTGTTCTATGCATATTCTTGGCTACCGTATCACACATCCGTGTG   |
| lcl | TC311277_UP | Q9LLI8_MAIZE (CesA2)  | 995  | ATCATTTCCGCTTATCATCTGTGCTTCTTCTTCCAATATCGFATCATCTCCAGTG        |
| lcl | TC294544_UP | Q9LLI9_MAIZE (CesA1)  | 1002 | ATCATTTCCGCTTATCATCTGTGCTTCTTCTTCCAATATCGFATCATCTCCAGTG        |

|     |             |                       |      |                                                                       |
|-----|-------------|-----------------------|------|-----------------------------------------------------------------------|
| lcl | TC300086_UP | Q9LLI4_MAIZE (CesA6)  | 1074 | CCTGATGCATTTGCTTTATGGCTCATATCTGTGATCTGTGAATTTGGTTGGCATGTCT            |
| lcl | TC280752_UP | Q9LLI2_MAIZE (CesA8)  | 1123 | AAAGATGCATTTGCATTTGTGGCTCATATCTGTGAATCTGTGAATCTGGTTTGGCATGTCC         |
| lcl | TC295737_UP | Q6UDF1_MAIZE (CesA10) | 820  | ACGGAAGCGGTGGCTCTGTGGCTGGCTCGTCAATCTGCGAGCTCTGGTTGCGCTTCTCC           |
| lcl | TC287832_UP | Q9LLI6_MAIZE (CesA4)  | 1209 | CGCAATGCATACCATTATGGCTTCTATCTGTTATATGTGAGATCTGGTTTGGCTTTTCG           |
| lcl | TC287831_UP | Q9LLI1_MAIZE (CesA9)  | 1132 | CGTAATGCATACCACCTGTGGCTTCTATCTGTTATATGTGAGATCTGGTTTGGCTTTTCC          |
| lcl | TC299205_UP | Q9LLI5_MAIZE (CesA5)  | 1099 | AACAATGCATATCCACTGTGGCTTTTATCGCTCATATGTGAGATCTGGTTTGGCTTTGTCC         |
| lcl | TC311277_UP | Q9LLI8_MAIZE (CesA2)  | 1055 | CGTAATGCATTTATGGATTTGTGGCTATATCTGTTATCTGTGAGCTCTGGTTTGGCTTGTCC        |
| lcl | TC294544_UP | Q9LLI9_MAIZE (CesA1)  | 1062 | CCTGATGCATTTATGGATTTATGGCTATATCTGTTATCTGCGAGCTCTGGTTTGGCTTGTCT        |
|     |             |                       |      |                                                                       |
| lcl | TC300086_UP | Q9LLI4_MAIZE (CesA6)  | 1134 | TGGATTCTTGAC CAGTTTCCAAAGTGTTTCCATTCGAGAGGGAAACCTATCTTGACCGG          |
| lcl | TC280752_UP | Q9LLI2_MAIZE (CesA8)  | 1183 | TGGATTCTTGAC CAGTTTCCAAAGTGTTTCCATTCGAGAGGGAAACCTATCTTGACCGG          |
| lcl | TC295737_UP | Q6UDF1_MAIZE (CesA10) | 880  | TGGATCTGAGC CAGCTCCAAAGTGTTTCCAAAGTGTTTCCATTCGAGAGGGAAACCTATCTTGACCGG |
| lcl | TC287832_UP | Q9LLI6_MAIZE (CesA4)  | 1269 | TGGATATGGATCAGTTCCCAAGTGTTTCCAAATCAACCGGAGACGTACCTTGATAGG             |
| lcl | TC287831_UP | Q9LLI1_MAIZE (CesA9)  | 1192 | TGGATATGGATCAGTTCCCAAGTGTTTCCAAATCAACCGGAGACGTACCTTGATAGG             |
| lcl | TC299205_UP | Q9LLI5_MAIZE (CesA5)  | 1159 | TGGATTTGGATCAGTTCCCAAGTGTTTCCCAATCAACCGTGAACATACCTTGATAGA             |
| lcl | TC311277_UP | Q9LLI8_MAIZE (CesA2)  | 1115 | TGGCTTCTAGATCAGTTCCCAAAATGGTATCCCAATCAACCGTGAACATACCTTGATAGA          |
| lcl | TC294544_UP | Q9LLI9_MAIZE (CesA1)  | 1122 | TGGCTTCTAGATCAGTTCCCAAAATGGTATCCCAATCAACCGTGAACATACCTTGATAGA          |
|     |             |                       |      |                                                                       |
| lcl | TC300086_UP | Q9LLI4_MAIZE (CesA6)  | 1194 | CTGAGTTTAAAGTTTGAACAAGGAGGCAATCCTTCTCAACTCGCCCTTGTGATTTCTTT           |
| lcl | TC280752_UP | Q9LLI2_MAIZE (CesA8)  | 1243 | TGTTCACCTAAGGTTTGACAAGGAGGTCACCCCTCTCAGCTTGCCTCAATCGACTTCTTT          |
| lcl | TC295737_UP | Q6UDF1_MAIZE (CesA10) | 940  | CTGGCCCTCCTGGTACGACCTGAGGGCGAGGCTGCTGCTGCTCCCATCGACTTCTTC             |
| lcl | TC287832_UP | Q9LLI6_MAIZE (CesA4)  | 1329 | CTGGCATTAAAGTTATGACCGGGAAGGTGAGCCATCTCAGTTGGCTCTGTTGACATTTTC          |
| lcl | TC287831_UP | Q9LLI1_MAIZE (CesA9)  | 1252 | CTGGCATTAAAGTTATGACCGGGAAGGTGAGCCATCTCAGTTGGCTCTGTTGACATTTTC          |
| lcl | TC299205_UP | Q9LLI5_MAIZE (CesA5)  | 1219 | CTGGCTTTAAGGTTATGACCGGAAGGTGAACCATCTCAATAGCTCTCTTGTGATATTTT           |
| lcl | TC311277_UP | Q9LLI8_MAIZE (CesA2)  | 1175 | CTTGCATTGAGGTATGATAGAGGGAGAGCCATCAGCTGGCTCCCATTTGATGCTTTT             |
| lcl | TC294544_UP | Q9LLI9_MAIZE (CesA1)  | 1182 | CTTGCATTGAGGTATGATAGAGGGAGAGCCATCAGCTGGCTCCCATTTGATGCTTTT             |
|     |             |                       |      |                                                                       |
| lcl | TC300086_UP | Q9LLI4_MAIZE (CesA6)  | 1254 | GTCAGTACGGTGGATCCCTGAAGGAACCTCCATTTGGTCACTGCTAATACTGTTCTATCT          |
| lcl | TC280752_UP | Q9LLI2_MAIZE (CesA8)  | 1303 | GTCAGTACGGTGGATCCCTGAAGGAACCTCCATTTGGTCACTGCTAATACTGTTCTATCT          |
| lcl | TC295737_UP | Q6UDF1_MAIZE (CesA10) | 1000 | GTCAGTACGGTGGATCCCTGAAGGAACCTCCATTTGGTCACTGCTAATACTGTTCTATCT          |
| lcl | TC287832_UP | Q9LLI6_MAIZE (CesA4)  | 1389 | GTCAGTACGGTGGATCCCTGAAGGAACCTCCATTTGGTCACTGCTAATACTGTTCTATCT          |
| lcl | TC287831_UP | Q9LLI1_MAIZE (CesA9)  | 1312 | GTCAGTACGGTGGATCCCTGAAGGAACCTCCATTTGGTCACTGCTAATACTGTTCTATCT          |
| lcl | TC299205_UP | Q9LLI5_MAIZE (CesA5)  | 1279 | GTCAGTACGGTGGATCCCTGAAGGAACCTCCATTTGGTCACTGCTAATACTGTTCTATCT          |
| lcl | TC311277_UP | Q9LLI8_MAIZE (CesA2)  | 1235 | GTCAGTACGGTGGATCCCTGAAGGAACCTCCATTTGGTCACTGCTAATACTGTTCTATCT          |
| lcl | TC294544_UP | Q9LLI9_MAIZE (CesA1)  | 1242 | GTCAGTACGGTGGATCCCTGAAGGAACCTCCATTTGGTCACTGCTAATACTGTTCTATCT          |
|     |             |                       |      |                                                                       |
| lcl | TC300086_UP | Q9LLI4_MAIZE (CesA6)  | 1314 | ATCCTTTCTGTTGATTATCCAGTTGATAAGGTTTCATGCTAGCTTTCTGATGATGGTCT           |
| lcl | TC280752_UP | Q9LLI2_MAIZE (CesA8)  | 1363 | ATCCTTTCTGTTGATTATCCAGTTGATAAGGTTTCATGCTAGCTTTCTGATGATGGTCT           |
| lcl | TC295737_UP | Q6UDF1_MAIZE (CesA10) | 1060 | ATCCTTTCTGTTGATTATCCAGTTGATAAGGTTTCATGCTAGCTTTCTGATGATGGTCT           |
| lcl | TC287832_UP | Q9LLI6_MAIZE (CesA4)  | 1449 | ATCCTTTCTGTTGATTATCCAGTTGATAAGGTTTCATGCTAGCTTTCTGATGATGGTCT           |
| lcl | TC287831_UP | Q9LLI1_MAIZE (CesA9)  | 1372 | ATCCTTTCTGTTGATTATCCAGTTGATAAGGTTTCATGCTAGCTTTCTGATGATGGTCT           |
| lcl | TC299205_UP | Q9LLI5_MAIZE (CesA5)  | 1339 | ATCCTTTCTGTTGATTATCCAGTTGATAAGGTTTCATGCTAGCTTTCTGATGATGGTCT           |
| lcl | TC311277_UP | Q9LLI8_MAIZE (CesA2)  | 1295 | ATCCTTTCTGTTGATTATCCAGTTGATAAGGTTTCATGCTAGCTTTCTGATGATGGTCT           |
| lcl | TC294544_UP | Q9LLI9_MAIZE (CesA1)  | 1302 | ATCCTTTCTGTTGATTATCCAGTTGATAAGGTTTCATGCTAGCTTTCTGATGATGGTCT           |
|     |             |                       |      |                                                                       |
| lcl | TC300086_UP | Q9LLI4_MAIZE (CesA6)  | 1374 | GCCATGCTGACATTTGAGCAATGCTGAAACATCTGAATTTGCAAGAAATGGGTTCC              |
| lcl | TC280752_UP | Q9LLI2_MAIZE (CesA8)  | 1423 | GCCATGCTGACATTTGAGCAATGCTGAAACATCTGAATTTGCAAGAAATGGGTTCC              |
| lcl | TC295737_UP | Q6UDF1_MAIZE (CesA10) | 1120 | TCCATGCTGCTCTCTGAGGCTCTGCTGAGACCGCCGAGTTGCGGCCCTGGGTGCC               |
| lcl | TC287832_UP | Q9LLI6_MAIZE (CesA4)  | 1509 | GCCATGCTGACATTTGAGCAATGCTGAAACATCTGAATTTGCAAGAAATGGGTTCC              |
| lcl | TC287831_UP | Q9LLI1_MAIZE (CesA9)  | 1432 | GCCATGCTGACATTTGAGCAATGCTGAAACATCTGAATTTGCAAGAAATGGGTTCC              |
| lcl | TC299205_UP | Q9LLI5_MAIZE (CesA5)  | 1399 | GCCATGCTGACATTTGAGCAATGCTGAAACATCTGAATTTGCAAGAAATGGGTTCC              |
| lcl | TC311277_UP | Q9LLI8_MAIZE (CesA2)  | 1355 | GCCATGCTGACATTTGAGCAATGCTGAAACATCTGAATTTGCAAGAAATGGGTTCC              |
| lcl | TC294544_UP | Q9LLI9_MAIZE (CesA1)  | 1362 | GCCATGCTGACATTTGAGCAATGCTGAAACATCTGAATTTGCAAGAAATGGGTTCC              |
|     |             |                       |      |                                                                       |
| lcl | TC300086_UP | Q9LLI4_MAIZE (CesA6)  | 1434 | TTCTCAGAAAAGATATAGCCTTGGCTCCCTGCTCCAGAGTGGTACTTCCAAACAGAAAGATA        |
| lcl | TC280752_UP | Q9LLI2_MAIZE (CesA8)  | 1483 | TTCTCAGAAAAGATATAGCCTTGGCTCCCTGCTCCAGAGTGGTACTTCCAAACAGAAAGATA        |
| lcl | TC295737_UP | Q6UDF1_MAIZE (CesA10) | 1180 | TTCTCAGAAAAGATATAGCCTTGGCTCCCTGCTCCAGAGTGGTACTTCCAAACAGAAAGATA        |
| lcl | TC287832_UP | Q9LLI6_MAIZE (CesA4)  | 1569 | TTTGTTAAGAAGTACAACATTGAACCTAGAGCTCCTGAATGGTACTTCCAAACAGAAAT           |
| lcl | TC287831_UP | Q9LLI1_MAIZE (CesA9)  | 1492 | TTTGTTAAGAAGTACAACATTGAACCTAGAGCTCCTGAATGGTACTTCCAAACAGAAAT           |
| lcl | TC299205_UP | Q9LLI5_MAIZE (CesA5)  | 1459 | TTTGTTAAGAAGTACAACATTGAACCTAGAGCTCCTGAATGGTACTTCCAAACAGAAAT           |
| lcl | TC311277_UP | Q9LLI8_MAIZE (CesA2)  | 1415 | TTTGTTAAGAAGTACAACATTGAACCTAGAGCTCCTGAATGGTACTTCCAAACAGAAAT           |
| lcl | TC294544_UP | Q9LLI9_MAIZE (CesA1)  | 1422 | TTTGTTAAGAAGTACAACATTGAACCTAGAGCTCCTGAATGGTACTTCCAAACAGAAAT           |

|     |             |                       |      |                                                                 |
|-----|-------------|-----------------------|------|-----------------------------------------------------------------|
| lcl | TC300086_UP | Q9LLI4_MAIZE (CesA6)  | 1494 | GACTACCTGAAAGACAAGGTGGCCGAAACTTTGTTAGAGACGGAGAGGAATGAAGAGA      |
| lcl | TC280752_UP | Q9LLI2_MAIZE (CesA8)  | 1543 | GACTACCTGAAAGACAAGGTGCTGCTTCATTTGTTAGGGAGAGGAGGGCCATGAAGAGA     |
| lcl | TC295737_UP | Q6UDF1_MAIZE (CesA10) | 1240 | GACTACCTGAAGACAAGGTGCAGCGGACCTTCTCFAAGGAGCGCGCGCCATGAAGAGG      |
| lcl | TC287832_UP | Q9LLI6_MAIZE (CesA4)  | 1629 | GATTACTTGAAGGACAAGTGCACCCCTTCATTTGTTAAAGACCGCCGGGCCATGAAGAGA    |
| lcl | TC287831_UP | Q9LLI1_MAIZE (CesA9)  | 1552 | GATTACTTGAAGGACAAGTGCACCCCTTCATTTGTTAAAGACCGCCGGGCCATGAAGAGA    |
| lcl | TC299205_UP | Q9LLI5_MAIZE (CesA5)  | 1519 | GATTACTTGAAGACAAGTGCACACTTCATTTGTTGAAAGACCGCCGGGCCATGAAGAGA     |
| lcl | TC311277_UP | Q9LLI8_MAIZE (CesA2)  | 1475 | GATTACCTGAAGGACAAAATTCACCTTCATTTGTTAAGGAAAGACGAGCAATGAAGAGA     |
| lcl | TC294544_UP | Q9LLI9_MAIZE (CesA1)  | 1482 | GATTACCTGAAGGACAAAATTCACCTTCATTTGTTAAGGAAAGACGCGCAATGAAGAGA     |
|     |             |                       |      |                                                                 |
| lcl | TC300086_UP | Q9LLI4_MAIZE (CesA6)  | 1554 | GAGTATGAGGAATTCAAGGTTCAGATCAATGCCCTTGGTTGCTAAAGCCAAAAGTTCCCT    |
| lcl | TC280752_UP | Q9LLI2_MAIZE (CesA8)  | 1603 | GAAATCGAGGAATTCAAGGTAAAGATCAATGCCCTTGGTTGCAAAAACCAATACCGGATCAT  |
| lcl | TC295737_UP | Q6UDF1_MAIZE (CesA10) | 1300 | GAGTACGAGGATTCAGGTCCCATCAAAGCCCTGCTGGCAGGCGCAGAGAAGCCC          |
| lcl | TC287832_UP | Q9LLI6_MAIZE (CesA4)  | 1689 | GAATATGAAGAATTCAAAGTAAAGGTAATGGCCTTGTGTAAAGCAGAAAAGTTCCCT       |
| lcl | TC287831_UP | Q9LLI1_MAIZE (CesA9)  | 1612 | GAATATGAAGAATTCAAAGTAAAGGTAATGGCCTTGTGTAAAGCAGAAAAGTTCCCT       |
| lcl | TC299205_UP | Q9LLI5_MAIZE (CesA5)  | 1579 | GAATATGAAGAATTCAAAGTAAAGGTAATGGCCTTGTGTAAAGCAGAAAAGTTCCCT       |
| lcl | TC311277_UP | Q9LLI8_MAIZE (CesA2)  | 1535 | GAGTATGAAGAATTCAAAGTAAAGATCAATGCCCTTGTGTCCAAAAGCAGAAAAGTCCCT    |
| lcl | TC294544_UP | Q9LLI9_MAIZE (CesA1)  | 1542 | GAGTATGAAGAATTCAAAGTAAAGATCAATGCCCTTGTGTCCAAAAGCAGAAAAGTCCCT    |
|     |             |                       |      |                                                                 |
| lcl | TC300086_UP | Q9LLI4_MAIZE (CesA6)  | 1614 | GAGGAAGGATGGCAATGCAGGATGGAACTCCATGGCCCGGAAATAATTCCTGATCAT       |
| lcl | TC280752_UP | Q9LLI2_MAIZE (CesA8)  | 1663 | GAGGAAGGATGGCAATGCAGGATGGAACTCCATGGCCCGGAAATAATTCCTGATCAT       |
| lcl | TC295737_UP | Q6UDF1_MAIZE (CesA10) | 1360 | GAGGAGGGGTGGGTTCATGCAAGGACGGCAGCCCTGGCCCGGGAACAACAGCCGACCCAC    |
| lcl | TC287832_UP | Q9LLI6_MAIZE (CesA4)  | 1749 | GAGGAAGGATGGATCATGCAAGATGGCACACCATGGCCAGGAAACAATACAGGGACCAT     |
| lcl | TC287831_UP | Q9LLI1_MAIZE (CesA9)  | 1672 | GAGGAAGGATGGATCATGCAAGATGGCACACCATGGCCAGGAAACAATACAGGGACCAT     |
| lcl | TC299205_UP | Q9LLI5_MAIZE (CesA5)  | 1639 | GAGGAGGGATGGATCATGCAAGATGGTACACCTTGGCCTGGGAACAATACAGGGACCAT     |
| lcl | TC311277_UP | Q9LLI8_MAIZE (CesA2)  | 1595 | GAGGAGGGGTGGACATGCGCTGATGGAACTGCTTGGCCCTGGGAAATAACCTAGGGACCAT   |
| lcl | TC294544_UP | Q9LLI9_MAIZE (CesA1)  | 1602 | GAGGAGGGGTGGACATGCGCTGATGGAACTGCTTGGCCCTGGGAAATAACCTAGGGACCAT   |
|     |             |                       |      |                                                                 |
| lcl | TC300086_UP | Q9LLI4_MAIZE (CesA6)  | 1674 | CCTGGAATGATTCAGGTTTTCTTGGTCAAAAGTGGTGGCCATGATGTGGAAGGAAATGAG    |
| lcl | TC280752_UP | Q9LLI2_MAIZE (CesA8)  | 1723 | CCTGGAATGATTCAGGTTTTCTTGGTCAAAAGTGGTGGCCATGATGTGGAAGGAAATGAG    |
| lcl | TC295737_UP | Q6UDF1_MAIZE (CesA10) | 1420 | CCGGCTATGATCCAGGTTACTCCTCGCAACCAAGGCCCTGCTGACCTGGAGGCCACAGAG    |
| lcl | TC287832_UP | Q9LLI6_MAIZE (CesA4)  | 1809 | CCTGGAATGATTCAGGTTTTCTTGGTCAAGTGGTGGCCCTTGTGATCTGAGGGCAATGAG    |
| lcl | TC287831_UP | Q9LLI1_MAIZE (CesA9)  | 1732 | CCTGGAATGATTCAGGTTTTCTTGGTCAAGTGGTGGCCCTTGTGATCTGAGGGCAATGAG    |
| lcl | TC299205_UP | Q9LLI5_MAIZE (CesA5)  | 1699 | CCTGGAATGATTCAGGTTTTCTTGGTCAAGTGGTGGCCCTTGTGATCTGAGGGCAATGAG    |
| lcl | TC311277_UP | Q9LLI8_MAIZE (CesA2)  | 1655 | CCTGCATGATTCAGGTTTTCTTGGTCAAGTGGTGGCCCTTGTGATCTGAGGGCAATGAG     |
| lcl | TC294544_UP | Q9LLI9_MAIZE (CesA1)  | 1662 | CCTGCATGATTCAGGTTTTCTTGGTCAAGTGGTGGCCCTTGTGATCTGAGGGCAATGAG     |
|     |             |                       |      |                                                                 |
| lcl | TC300086_UP | Q9LLI4_MAIZE (CesA6)  | 1734 | CTGCCTCGATGGTTTTATGTTTCAACGAGAAAAAGCCAGGCTACCAACCATCACAAGAAG    |
| lcl | TC280752_UP | Q9LLI2_MAIZE (CesA8)  | 1783 | TTGCCCTCGCCTTTGTTTTATGTTCTCGAGAGAAAAAGCCAGGCTTATAACCATCACAAGAAG |
| lcl | TC295737_UP | Q6UDF1_MAIZE (CesA10) | 1480 | CTGCCGCGCCTCTGCTACTGCTTCCCGTGAAGAGCCGCCCGGCTACCAACCCACAAGAAG    |
| lcl | TC287832_UP | Q9LLI6_MAIZE (CesA4)  | 1869 | CTACCCCGTTTTGGTCTATGTTTCTCGTGAAGAGCCCTCTGGATTCAGCATCACAAGAAA    |
| lcl | TC287831_UP | Q9LLI1_MAIZE (CesA9)  | 1792 | CTACCCCGTTTTGGTCTATGTTTCTCGTGAAGAGCCCTCTGGATTCAGCATCACAAGAAA    |
| lcl | TC299205_UP | Q9LLI5_MAIZE (CesA5)  | 1759 | CTTCCCTCGTTTTGGTTTTATGTTTCTCGTGAAGAGCCGCTGCTTCCAGCATCACAAGAAG   |
| lcl | TC311277_UP | Q9LLI8_MAIZE (CesA2)  | 1715 | TTACCACGCTTTGCTCTATGTTCTCTCGTGAAGAGACCAGGCTTTTCCAGCATCACAAGAAG  |
| lcl | TC294544_UP | Q9LLI9_MAIZE (CesA1)  | 1722 | TTACCACGCTTTGCTCTATGTTCTCTCGTGAAGAGACCAGGCTTTTCCAGCATCACAAGAAG  |
|     |             |                       |      |                                                                 |
| lcl | TC300086_UP | Q9LLI4_MAIZE (CesA6)  | 1794 | GCTGGTGCATGAATGCATGGTCCAGTCTCTGCTGTACTACTAATGCTCCTTATTGTG       |
| lcl | TC280752_UP | Q9LLI2_MAIZE (CesA8)  | 1843 | GCTGGTGCATGAATGCATGGTCCAGTCTCTGCTGTACTACTAATGCTCCTTATTGTG       |
| lcl | TC295737_UP | Q6UDF1_MAIZE (CesA10) | 1540 | GCCGGCGCCATGAACCGCCTGGTGGCGTCTCCGCCGTCTCACCAACCGCCCTTACTC       |
| lcl | TC287832_UP | Q9LLI6_MAIZE (CesA4)  | 1929 | GCTGGTGCATGAATGCATGGTCCAGTCTCTGCTGTACTACTAATGCTCCTTATTGTG       |
| lcl | TC287831_UP | Q9LLI1_MAIZE (CesA9)  | 1852 | GCTGGTGCATGAATGCATGGTCCAGTCTCTGCTGTACTACTAATGCTCCTTATTGTG       |
| lcl | TC299205_UP | Q9LLI5_MAIZE (CesA5)  | 1819 | GCTGGTGCATGAATGCATGGTCCAGTCTCTGCTGTACTACTAATGCTCCTTATTGTG       |
| lcl | TC311277_UP | Q9LLI8_MAIZE (CesA2)  | 1775 | GCTGGTGCATGAATGCATGGTCCAGTCTCTGCTGTACTACTAATGCTCCTTATTGTG       |
| lcl | TC294544_UP | Q9LLI9_MAIZE (CesA1)  | 1782 | GCTGGTGCATGAATGCATGGTCCAGTCTCTGCTGTACTACTAATGCTCCTTATTGTG       |
|     |             |                       |      |                                                                 |
| lcl | TC300086_UP | Q9LLI4_MAIZE (CesA6)  | 1854 | CTGAACCTGGATTGTGATCACTATATCAATAAATAGTAAAGGCTATAAAGGAAGCATATGTG  |
| lcl | TC280752_UP | Q9LLI2_MAIZE (CesA8)  | 1903 | TTGAACCTGGACTGTGATCACTACATCAACAAATAGCAAGGCCATAAAAGAGGCTATGTGT   |
| lcl | TC295737_UP | Q6UDF1_MAIZE (CesA10) | 1600 | CTCAACCTCGACTCGACCACTACCTCAACAACAGCAAGGCCGTGCGCGAGGCATGTGC      |
| lcl | TC287832_UP | Q9LLI6_MAIZE (CesA4)  | 1989 | TTGAATCTTGATTGTGATCACTACATTAACAACAGTAAGGCTCTCAGGGAAGCTATGTGC    |
| lcl | TC287831_UP | Q9LLI1_MAIZE (CesA9)  | 1912 | TTGAATCTTGATTGTGATCACTACATCAACAACAGTAAGGCTCTCAGGGAAGCTATGTGC    |
| lcl | TC299205_UP | Q9LLI5_MAIZE (CesA5)  | 1879 | TTGAATCTTGACTGTGACCACTACATCAATAAATAGCAAGGCTCTTCGAGAAGCTATGTGC   |
| lcl | TC311277_UP | Q9LLI8_MAIZE (CesA2)  | 1835 | CTCAATCTGGATTGTGACCACTTACTTCAATAAGCAGCAAGGCTCTTAGAGAAGCATGTGC   |
| lcl | TC294544_UP | Q9LLI9_MAIZE (CesA1)  | 1842 | CTCAATCTGGATTGTGACCACTTACTTCAATAAGCAGCAAGGCTCTTAGAGAAGCATGTGC   |



lcl|TC300086\_UP|Q9LLI4\_MAIZE (CesA6)\_ 2307 GATG-----AAGCCGCTCCAG-----GAGCTG---AAAATGANAAGG--  
lcl|TC280752\_UP|Q9LLI2\_MAIZE (CesA8)\_ 2350 GATG-----AAGGCGCTCCAG-----GTGCTG---ATATCGAGAAGG--  
lcl|TC295737\_UP|Q6UDF1\_MAIZE (CesA10)\_ 2080 GCGCGCGGCTGTACAAAGAAACACCAGCGCGCTTCGAGCTGGAGGAGATCGAGGAGGGG  
lcl|TC287832\_UP|Q9LLI6\_MAIZE (CesA4)\_ 2400 GAGG-----AGGGAGTTGAAG-----GCCGTGGATTTC---ACGACGAGAAA---  
lcl|TC287831\_UP|Q9LLI1\_MAIZE (CesA9)\_ 2326 GAGG-----AGGGAGTTGAAG-----GCCGTGGATTTC---ATGATGAGAAA---  
lcl|TC299205\_UP|Q9LLI5\_MAIZE (CesA5)\_ 2290 GAGG-----AAGGGATTGAAG-----GTTCTCAGTTTC---ATGATGAGAAA---  
lcl|TC311277\_UP|Q9LLI8\_MAIZE (CesA2)\_ 2252 GAGG-----AGGGATTGAAG-----GT-----TATG---AGGATGAAAGG---  
lcl|TC294544\_UP|Q9LLI9\_MAIZE (CesA1)\_ 2259 GAAG-----AGGGATTGAAG-----GT-----TACG---AGGATGAAAGG---

lcl|TC300086\_UP|Q9LLI4\_MAIZE (CesA6)\_ 2341 CTAGTATTCTAAATCAA-----CAGAAG---TTGGAANAAG  
lcl|TC280752\_UP|Q9LLI2\_MAIZE (CesA8)\_ 2384 CCGGAATCTAAATCAA-----CAGAAA---CTAGAGAAAG  
lcl|TC295737\_UP|Q6UDF1\_MAIZE (CesA10)\_ 2140 CTGGAGGGGTACACAGAGCTGGAGCGCTCCTCGCTCATGTCGCAGAAAGACTTCGAGAAAG  
lcl|TC287832\_UP|Q9LLI6\_MAIZE (CesA4)\_ 2439 -TCAGTTCTTATGTCTC-----AAATGAGCTTGGAGAAAG  
lcl|TC287831\_UP|Q9LLI1\_MAIZE (CesA9)\_ 2365 -TCAGTTCTTATGTCTC-----AAATGAGCTTGGAGAAAG  
lcl|TC299205\_UP|Q9LLI5\_MAIZE (CesA5)\_ 2329 -TCAGTTCTTATGTCTC-----AAATGAGCTTGGAGAAAG  
lcl|TC311277\_UP|Q9LLI8\_MAIZE (CesA2)\_ 2285 -TCAGTTCTTATGTCTC-----AGAGGAATTTGGAGAAA  
lcl|TC294544\_UP|Q9LLI9\_MAIZE (CesA1)\_ 2292 -TCAGCGCTTATGTCTC-----AGAGGAATTTGGAGAAA

lcl|TC300086\_UP|Q9LLI4\_MAIZE (CesA6)\_ 2373 AAATTTGGCCAGTCTTCAGTTTTTGTGTCATCCACACTTCTTGGAGAAAGG-TGGAACCCT  
lcl|TC280752\_UP|Q9LLI2\_MAIZE (CesA8)\_ 2416 AAATTTGGCCAGTCTTCTGTTTTTGTGTCATCCACACTTCTTGGAGAAAGG-AGGGACCCT  
lcl|TC295737\_UP|Q6UDF1\_MAIZE (CesA10)\_ 2200 CGGTTCCGCCAGTCCCGCTTCTCAGCTCCACCTCTGAGGACCG-CGGCCTGCC  
lcl|TC287832\_UP|Q9LLI6\_MAIZE (CesA4)\_ 2472 AGATTTGGCCAGTCCCGAGCTTTGTTGCTCCACTCTGATGGAGTATGG-TGGTGTGCC  
lcl|TC287831\_UP|Q9LLI1\_MAIZE (CesA9)\_ 2398 AGATTTGGCCAACTCTCCAGCTTTTGTGCTCCACTCTGATGGAAATATGG-TGGTGTGCC  
lcl|TC299205\_UP|Q9LLI5\_MAIZE (CesA5)\_ 2362 AGATTTGGCCAGTCCAGTGTTTTTTGTAGCTCTACTCTCATGGAAATATGG-CGGTGTGCC  
lcl|TC311277\_UP|Q9LLI8\_MAIZE (CesA2)\_ 2318 CGCTTTGGTCCAGTCTCCAAATCTCATTGTCATCCACCTTTATGACTCAAGG-TGGCATACC  
lcl|TC294544\_UP|Q9LLI9\_MAIZE (CesA1)\_ 2325 CGCTTTGGTCCAGTCTCTAATTTCTATTGTCATCCACCTTTATGACTCAAGCCTGGCATACC

lcl|TC300086\_UP|Q9LLI4\_MAIZE (CesA6)\_ 2432 CAAGAGTGCAG-----GTCCAGCTTCTCTCTGAAGGAAGCTATACATGTCCATCAGTTG  
lcl|TC280752\_UP|Q9LLI2\_MAIZE (CesA8)\_ 2475 CAAGAGCGCAA-----GTCCAGCTTCTCTCTGAAGGAAGCTATACATGTTCATCAGCTG  
lcl|TC295737\_UP|Q6UDF1\_MAIZE (CesA10)\_ 2259 CCAGGGCCGCCCGCCCGCCAGTCCAGTGGGGCAAGGAGATTGGGTGGATCTATGGCTCGGTGAC  
lcl|TC287832\_UP|Q9LLI6\_MAIZE (CesA4)\_ 2531 TCAGTCCGCAA-----CTCCGGACTCTCTTCTGAAAGAAAGCTATCCATGTTCATAAGCTG  
lcl|TC287831\_UP|Q9LLI1\_MAIZE (CesA9)\_ 2457 TCAGTCTGCGA-----CTCCGGAATCTCTTCTGAAAGAAAGCTATCCATGTCCATAAGCTG  
lcl|TC299205\_UP|Q9LLI5\_MAIZE (CesA5)\_ 2421 ACAATCTGCAA-----CTCCAGACTCTCTCTGAAAGAAAGCTATACATGTCCATCAGCTG  
lcl|TC311277\_UP|Q9LLI8\_MAIZE (CesA2)\_ 2377 ACCTTCAACAA-----ACCCAGCTTCTCTACTGAGGAAGCTATCCATGTTCATCAGCTG  
lcl|TC294544\_UP|Q9LLI9\_MAIZE (CesA1)\_ 2385 ACCTTCAACAA-----ACCCAGCTTCTCTACTAAGGAAGCTATCCATGTCCATCAGTTG

lcl|TC300086\_UP|Q9LLI4\_MAIZE (CesA6)\_ 2486 TGGATATGAAAGACAAACAGCTGGGGAAAAGATATTGGTGGATTATGGATCAGTAC  
lcl|TC280752\_UP|Q9LLI2\_MAIZE (CesA8)\_ 2529 GGGTACGAAAGCAAGACCGACTGGGGAAAAGAGATTGGCTGGATTATCGGATCGATAC  
lcl|TC295737\_UP|Q6UDF1\_MAIZE (CesA10)\_ 2319 GGGATACGAGCAAGACCGAGTGGGGCAAGGAGATTGGGTGGATCTATGGCTCGGTGAC  
lcl|TC287832\_UP|Q9LLI6\_MAIZE (CesA4)\_ 2585 TGGCTATGAGGACAAGACTGAATGGGGAACTGAGATCGGGTGGATCTACGGTCTGTGAC  
lcl|TC287831\_UP|Q9LLI1\_MAIZE (CesA9)\_ 2511 TGGCTACGAGGACAAGACTGAATGGGGAACTGAGATTGGGTGGATCTATGGTCTGTGAC  
lcl|TC299205\_UP|Q9LLI5\_MAIZE (CesA5)\_ 2475 TGGCTATGAGGACAAGACTGAATGGGGAACTGAGATTGGGTGGATCTATGGTCTGTGAC  
lcl|TC311277\_UP|Q9LLI8\_MAIZE (CesA2)\_ 2431 TGGGTACGAGGACAAGACTGAATGGGGAAAAGAGATTGGCTGGATCTATGGTTCAGTTAC  
lcl|TC294544\_UP|Q9LLI9\_MAIZE (CesA1)\_ 2439 TGGATATGAGGACAAGACTGAATGGGGAAAAGAGATTGGCTGGATCTATGGTTCAGTTAC

lcl|TC300086\_UP|Q9LLI4\_MAIZE (CesA6)\_ 2546 AGAAGATATTCTTACTGGGTTAAGATGCACTGCATCGGTGGCGGTCAATTTACTGCAT  
lcl|TC280752\_UP|Q9LLI2\_MAIZE (CesA8)\_ 2589 AGAGGATATTCTGACTGGATTAAGATGCACTGCCATGGCTGGCGGTCTATTTACTGCAT  
lcl|TC295737\_UP|Q6UDF1\_MAIZE (CesA10)\_ 2379 AGAGGATATTCTGACTGGGTTAAGATGCACTGCAGGGGGTGGAACTGCTGACTGCAT  
lcl|TC287832\_UP|Q9LLI6\_MAIZE (CesA4)\_ 2645 AGAAGCATTTCTTACCAGGATTCAGATGCACGCCGAGGCTGGCGGTCAATCTACTGCAT  
lcl|TC287831\_UP|Q9LLI1\_MAIZE (CesA9)\_ 2571 GGAAGATATTCTTACTGGGTTAAGATGCACGCCAGGCTGGCGGTCAATCTACTGCAT  
lcl|TC299205\_UP|Q9LLI5\_MAIZE (CesA5)\_ 2535 AGAAGCATTTCTTACCAGGATTCAGATGCATGCTCGAGGCTGGCGATCAATCTACTGCAT  
lcl|TC311277\_UP|Q9LLI8\_MAIZE (CesA2)\_ 2491 AGAGGATATTCTGACTGGGTTAAGATGCATGCAGAGGCTGGCAATCAATCTACTGCAT  
lcl|TC294544\_UP|Q9LLI9\_MAIZE (CesA1)\_ 2499 GGAGGATATTCTGACTGGGTTAAGATGCATGCAGGGCTGGCAATCAATCTACTGCAT

lcl|TC300086\_UP|Q9LLI4\_MAIZE (CesA6)\_ 2606 ACCTAAACCGCCCGCCTTCAAAGGTTCCGCACCTCTCAATCTTCCGATCGTCTTACCA  
lcl|TC280752\_UP|Q9LLI2\_MAIZE (CesA8)\_ 2649 CCGAAGCGGCCGCAATCAAAGGTTCTGCGCCTCTCAACCTTTCGGACCGTCTTACCA  
lcl|TC295737\_UP|Q6UDF1\_MAIZE (CesA10)\_ 2439 GCCGACACCGCCCGCCTTCAAAGGTTCTGCGCCTCAATCTTCTGATCGTCTTACCA  
lcl|TC287832\_UP|Q9LLI6\_MAIZE (CesA4)\_ 2705 GCCCAAGCGGCCAGCTTCAAAGGTTCTGCGCCTCAATCTTTCGGACCGTCTTACCA  
lcl|TC287831\_UP|Q9LLI1\_MAIZE (CesA9)\_ 2631 GCCTAAGCGGCCGCTTCAAAGGTTCTGCGCTCCATCAATCTCTCAGACCGTCTTACCA  
lcl|TC299205\_UP|Q9LLI5\_MAIZE (CesA5)\_ 2595 GCCCAAGCGCACCGCTTCAAAGGTTCTGCTCCATCAACCTTTCGGATGCTTCAATCA  
lcl|TC311277\_UP|Q9LLI8\_MAIZE (CesA2)\_ 2551 CCGTACCGACCTTGTTCAAAGGTTCTGCACCAATCAATCTTCTGATCGTCTTAAATCA  
lcl|TC294544\_UP|Q9LLI9\_MAIZE (CesA1)\_ 2559 GCCCAACCGACCTTGTTCAAAGGTTCTGCACCAATCAATCTTTCGATCGTCTTAAATCA

lcl|TC300086\_UP|Q9LLI4\_MAIZE (CesA6)\_ 2666 GGTTCCTTCGGTGGGCTCTGGTTCATTTGAAATTTCTCTCAGCAAGCACTGCCCTCTCTG  
lcl|TC280752\_UP|Q9LLI2\_MAIZE (CesA8)\_ 2709 GGTTCCTTCGGTGGGCTCTGGGTCGTGAAATTTCTCTCAGCAAGCACTGCCACTTTG  
lcl|TC295737\_UP|Q6UDF1\_MAIZE (CesA10)\_ 2499 GGTGCTCCGCTGGGCGCTGGGTCCTGGAGATCTTATGAGCCGCACTGCCCGCTCTG  
lcl|TC287832\_UP|Q9LLI6\_MAIZE (CesA4)\_ 2765 GGTGCTCCGGTGGGCTCTGGGTCCTGGAGATCTCTTTCAGCCGGCACTGCCCGCTCTG  
lcl|TC287831\_UP|Q9LLI1\_MAIZE (CesA9)\_ 2691 GGTGCTCCGGTGGGCTCTGGTTCAGTGGAAATCTTTTCAGCCGGCACTGCCCGCTATG  
lcl|TC299205\_UP|Q9LLI5\_MAIZE (CesA5)\_ 2655 AGTGCTTCGGTGGGCTCTGGTTCATTTGAAATTTCTTTCAGCAGGCATTTGCCATATG  
lcl|TC311277\_UP|Q9LLI8\_MAIZE (CesA2)\_ 2611 GGTGCTCCGCTGGGCTCTGGGTCAGTGGAAATTTCTGTTAGCAGACATTTGTCCTATATG  
lcl|TC294544\_UP|Q9LLI9\_MAIZE (CesA1)\_ 2619 GGTGCTCCGCTGGGCTCTGGGTCAGTGGAAATTTCTGTTAGTAGACATTTGTCCTATCTG

lcl|TC300086\_UP|Q9LLI4\_MAIZE (CesA6)\_ 2726 GTATGGGTATGGTGGTGGACTAAAGTTCCTGGAAAGGTTTTCTACATTAACCCATCGT  
lcl|TC280752\_UP|Q9LLI2\_MAIZE (CesA8)\_ 2769 GTACGGGTACGGGGCGGGCTAAAATTCCTGGAAAGGTTTTCTTATATCAACCCATCGT  
lcl|TC295737\_UP|Q6UDF1\_MAIZE (CesA10)\_ 2559 GTACCGCTACGGGGCGGGCTCAAGTGGCTGGAGAGCTTCGCTTACACCAACACCATCGT  
lcl|TC287832\_UP|Q9LLI6\_MAIZE (CesA4)\_ 2825 GTACGGCTACGGAGGGCGGGCTCAAGTTCCTGGAGAGATTCGGGTACATCAACACCACAT  
lcl|TC287831\_UP|Q9LLI1\_MAIZE (CesA9)\_ 2751 GTACGGCTACGGAGGGCGCTGAAGTCTTGGAGAGATTCGGGTACATCAACACCACAT  
lcl|TC299205\_UP|Q9LLI5\_MAIZE (CesA5)\_ 2715 GTATGGCTATGGAGGTCGGCTTAAATTCCTGGAGAGATTTGCTTATATCAACACACAAAT  
lcl|TC311277\_UP|Q9LLI8\_MAIZE (CesA2)\_ 2671 GTATGGCTACAAATGGGCGATTTGAAGCTTTTGGAGAGGCTGGCTTACATTAACACCATTGT  
lcl|TC294544\_UP|Q9LLI9\_MAIZE (CesA1)\_ 2679 GTATGGTTACAATGGACGATTTGAAGCTTTTGGAGAGGCTGGCTTACATCAACACTATTGT

lcl|TC300086\_UP|Q9LLI4\_MAIZE (CesA6)\_ 2786 ATACCTTTGGACATCTATCCCGCTCTGGCTATTTGCAATTTGCCTGCCATCTGCTTGT  
lcl|TC280752\_UP|Q9LLI2\_MAIZE (CesA8)\_ 2829 TTATCCCTGGACCTCCATTCCTCTCTCTGGCTTACTGTACCTTGCCTGCCATCTGCCTGCT  
lcl|TC295737\_UP|Q6UDF1\_MAIZE (CesA10)\_ 2619 GTACCCCTTCACCTCCATCCCGCTCTCTGCTACTGCAACCTCCCGCTCTGCCTGCT  
lcl|TC287832\_UP|Q9LLI6\_MAIZE (CesA4)\_ 2885 GTACCCCTTCACCTCCATCCCGCTCTCTCTACTGTATCTGCTCCCGCATCTGCTGCT  
lcl|TC287831\_UP|Q9LLI1\_MAIZE (CesA9)\_ 2811 GTACCCCTTCACCTCCCGCTCTCTTACTGTATCTGCTGCCATCTGCCTGCT  
lcl|TC299205\_UP|Q9LLI5\_MAIZE (CesA5)\_ 2775 TTATCCACTCACATCAATCCCGCTCTCTCTGCTACTGATATGCAATGCAATTTGCTTCT  
lcl|TC311277\_UP|Q9LLI8\_MAIZE (CesA2)\_ 2731 TTATCCAAATCACATCTCTTCCGCTTATCGCTATTTGTGTCTTCTGCTATCTGCTCTCT  
lcl|TC294544\_UP|Q9LLI9\_MAIZE (CesA1)\_ 2739 ATATCCAAATCACATCCATTCGCTTATTTGCTATTTGTGTCTTCCCGCTATCTGCCTCT

lcl|TC300086\_UP|Q9LLI4\_MAIZE (CesA6)\_ 2846 GACAGGGAAATTTATCAGCCAGAGCTTAACAATGTTGCCAGCTTTGGTTTATGTCACT  
lcl|TC280752\_UP|Q9LLI2\_MAIZE (CesA8)\_ 2889 CACCGGGAAGTTTATCAGCCAGAGCTTAACAATGTTGCCAGTATCTGGTTTATGTCACT  
lcl|TC295737\_UP|Q6UDF1\_MAIZE (CesA10)\_ 2679 CACCGGGAAGTTTATCATTCCAGCTTGAACAACCTGCCAGCATCTGGTTTATGTCACT  
lcl|TC287832\_UP|Q9LLI6\_MAIZE (CesA4)\_ 2945 CACCGGGAAGTTTATCATTCAGAGATCAGCAACTTCCAGCATCTGGTTTATGTCACT  
lcl|TC287831\_UP|Q9LLI1\_MAIZE (CesA9)\_ 2871 CACCGGGAAGTTTATCATCCAGAGATCAGCAACTTCCAGTATCTGGTTTATGTCACT  
lcl|TC299205\_UP|Q9LLI5\_MAIZE (CesA5)\_ 2835 CACTGGGAAGTTTATCATCCCAAGATTAGTAACTTACAGAGTGTTTGGTTTATATCTCT  
lcl|TC311277\_UP|Q9LLI8\_MAIZE (CesA2)\_ 2791 TACCAATAAATTTATCATCTCTGAGATTAGTAAATTTATGCTGGATTTCTTCTCTCT  
lcl|TC294544\_UP|Q9LLI9\_MAIZE (CesA1)\_ 2799 TACCAATAAATTTATCATCTCTGAGATTAGCAATTTATGCTGGATTTCTTCTCTCTCT

lcl|TC300086\_UP|Q9LLI4\_MAIZE (CesA6)\_ 2906 TTTTCATCTGCATTTTTCGTACGAGATCTCTGGAAATGAGATGGAGTTGGTGTAGGCATCGA  
lcl|TC280752\_UP|Q9LLI2\_MAIZE (CesA8)\_ 2949 TTTTCATCTGCATCTCCCTGACCGGATCTCTGGAAATGAGGTGGAGTTGGCTGCGCATCGA  
lcl|TC295737\_UP|Q6UDF1\_MAIZE (CesA10)\_ 2739 CTTCTCTTCCATCATCCGACAGAGCTCTCTGGAGCTCGGGTGGAGGGGGTGAATCGA  
lcl|TC287832\_UP|Q9LLI6\_MAIZE (CesA4)\_ 3005 CTTTCATCTGCATCTTCCGACAGGGCATCTCTGGAGATGAGGTGGAGCGGGTGGGCATCGA  
lcl|TC287831\_UP|Q9LLI1\_MAIZE (CesA9)\_ 2931 CTTTCATCTGCATCTTCCGACAGGGATCTCTGGAGATGAGGTGGAGCGGGTGGGCATCGA  
lcl|TC299205\_UP|Q9LLI5\_MAIZE (CesA5)\_ 2895 CTTTCATCTGCATCTTCCGACTGGTATCTCTGGAGATGAGGTGGAGTTGGTGTGGCATGGA  
lcl|TC311277\_UP|Q9LLI8\_MAIZE (CesA2)\_ 2851 TTTTCCTCCATTTTCCGAACTGGTATATTGGAGCTTACATGGAGTTGGTGTGGCATGGA  
lcl|TC294544\_UP|Q9LLI9\_MAIZE (CesA1)\_ 2859 TTTTCCTCCATTTTCCCACTGGTATATTGGAGCTTACATGGAGGGGTGTGGCATGGA

lcl|TC300086\_UP|Q9LLI4\_MAIZE (CesA6)\_ 2966 TGACTGGTGGAGAAACGAGCAGTTTTCGGTTCATTTGGAGCCGTCTCTTTCATCTCTTTGC  
lcl|TC280752\_UP|Q9LLI2\_MAIZE (CesA8)\_ 3009 CGACTGGTGGAGGAACGAGCAGTTTCTGGTTCATCGGAGCCCTTTCCGGCATCTCTTCCG  
lcl|TC295737\_UP|Q6UDF1\_MAIZE (CesA10)\_ 2799 GGACTGGTGGCGAAACGAGCAGTTTCTGGTTCATCGGCGCTTCTCCGCGCATCTCTTCCG  
lcl|TC287832\_UP|Q9LLI6\_MAIZE (CesA4)\_ 3065 CGAGTGGTGGAGGAACGAGCAGTTTCTGGTTCATCGGAGCCATCTCCGCACTCTTCCG  
lcl|TC287831\_UP|Q9LLI1\_MAIZE (CesA9)\_ 2991 CGAGTGGTGGAGGAACGAGCAGTTTCTGGTTCATCGGAGCCATCTCCGCACTCTTCCG  
lcl|TC299205\_UP|Q9LLI5\_MAIZE (CesA5)\_ 2955 TGAATGGTGGAGGAACGAGCAGTTTCTGGTTCATTTGGTGTATTTCTGCGCATTTATTTCG  
lcl|TC311277\_UP|Q9LLI8\_MAIZE (CesA2)\_ 2911 AGATTTGGTGGAGAAATGAGCAGTTTTCGGTTCATTTGGTGGCACTCTGCGCATCTCTTCCG  
lcl|TC294544\_UP|Q9LLI9\_MAIZE (CesA1)\_ 2919 AGATTTGGTGGAGAAATGAGCAGTTTTCGGTTCATTTGGTGGCACTCTGCGCATCTCTTCCG

lcl|TC300086\_UP|Q9LLI4\_MAIZE (CesA6)\_ 3026 TGTGTTCAGGGACTCTCAAGGTCATAGCTGGTGTAGACACAGCTTCACTGTACATC  
lcl|TC280752\_UP|Q9LLI2\_MAIZE (CesA8)\_ 3069 GGTGTTCAGGGCTGCTCAAGGTCCTGCGCGCATCGACACAGCTTCAACCGTCACTC  
lcl|TC295737\_UP|Q6UDF1\_MAIZE (CesA10)\_ 2859 CGTGTTCAGGGCTCTCTCAAGGTCCTGCGCGCTGACACAGCTTCAACCGTCACTC  
lcl|TC287832\_UP|Q9LLI6\_MAIZE (CesA4)\_ 3125 CGTGTTCAGGGCTGCTCAAGGTCCTGCGCGCATCGACACCACTTCAACCGTCACTC  
lcl|TC287831\_UP|Q9LLI1\_MAIZE (CesA9)\_ 3051 CGTGTTCAGGGCTCTCTCAAGGTCCTGCGCGCATCGACACCACTTCAACCGTCACTC  
lcl|TC299205\_UP|Q9LLI5\_MAIZE (CesA5)\_ 3015 CGTGTTCAGGGCTCTCTCAAGGTCCTGCTGCTATCGACACAGCTTCACTGTACCTC  
lcl|TC311277\_UP|Q9LLI8\_MAIZE (CesA2)\_ 2971 GGTGTTCAGGGCTGCTCAAGGTCCTGCGCGCATCGATACCACTTCAACAGTACCTC  
lcl|TC294544\_UP|Q9LLI9\_MAIZE (CesA1)\_ 2979 AGTGTTCAGGGCTGCTCAAGGTCCTGCGCGCATCGATACCACTTCAACAGTACCTC



lcl|TC300086\_UP|Q9LLI4\_MAIZE (CesA6)\_\_\_ 3086 CAAGGCGCGGAGACGACGAGGA----GTTCTCAGAG--CTCTACACATTCAAATGGACGAC  
lcl|TC280752\_UP|Q9LLI2\_MAIZE (CesA8)\_\_\_ 3129 GAAGGCCGGGAGCAGCAGGGA----GTTCTCGGAG--CTGTACAGCTTCAAGTGGACCAC  
lcl|TC295737\_UP|Q6UDF1\_MAIZE (CesA10)\_\_\_ 2919 CAAGGCGGGCGGCGACGAGGCGGAGCCCTTCGGGAGACTCTACCTTTTCAAGTGGACCAC  
lcl|TC287832\_UP|Q9LLI6\_MAIZE (CesA4)\_\_\_ 3185 CAAGGCCTCGGACGAGGACGGC---GACTTCGGCGGAGCTGTACATGTTCAAGTGGACGAC  
lcl|TC287831\_UP|Q9LLI1\_MAIZE (CesA9)\_\_\_ 3111 CAAGGCCTCGGATGAAGACGGC---GACTTCGGCGGAGCTGTACATGTTCAAGTGGACGAC  
lcl|TC299205\_UP|Q9LLI5\_MAIZE (CesA5)\_\_\_ 3075 TAAGGCCACTGACGAGAAGGT---GATTTTGGCGAGCTCTACATGTTCAAGTGGACGAC  
lcl|TC311277\_UP|Q9LLI8\_MAIZE (CesA2)\_\_\_ 3031 AAAGGCATCTGATGAGGATGGC---GACTTTGCTGAGCTATATGTTTCAAGTGGACCAG  
lcl|TC294544\_UP|Q9LLI9\_MAIZE (CesA1)\_\_\_ 3039 AAAGGCATCTGATGAGGATGGC---GACTTTGCTGAGCTATATGTTTCAAGTGGACCAG

lcl|TC300086\_UP|Q9LLI4\_MAIZE (CesA6)\_\_\_ 3140 CCTTCTGATAACCTCCGACAACCTGCTCCTACTCAACTTCATTTGGAAGTGGTATGCTGGCAT  
lcl|TC280752\_UP|Q9LLI2\_MAIZE (CesA8)\_\_\_ 3183 CCTGTGATACCCCGCACCAGCTCCTCCTGCTGAACCTTCATTCGGGCTGGTGGCCGGGAT  
lcl|TC295737\_UP|Q6UDF1\_MAIZE (CesA10)\_\_\_ 2979 CCTGTGATGCCCGCCACCAGGCTCATCATCAACATGGTGGGATCCTGGCCGGCCT  
lcl|TC287832\_UP|Q9LLI6\_MAIZE (CesA4)\_\_\_ 3242 GCTTCTGATCCCGCCACCACCCTCCTGATCATCAACTGGTGGGGTCTGCGCCGGAT  
lcl|TC287831\_UP|Q9LLI1\_MAIZE (CesA9)\_\_\_ 3168 ACTCTGATTCGCCCGCCACCACCCTCCTGATCATCAACTGGTGGGGTCTGCGCCGGAT  
lcl|TC299205\_UP|Q9LLI5\_MAIZE (CesA5)\_\_\_ 3132 GCTTCTGATCCCGCCACCACCCTATTTGATCATCAACTGGTGGGGTCTGCGCCGGAT  
lcl|TC311277\_UP|Q9LLI8\_MAIZE (CesA2)\_\_\_ 3088 TTTGCTCATCCCGCACCAGCTGTTCTTCTCATTAACCTGCTCGGAATGGTGGGAGGAAAT  
lcl|TC294544\_UP|Q9LLI9\_MAIZE (CesA1)\_\_\_ 3096 TTTGCTCATTCCTCCGACCAGCTGTTCTTCTCATTAACCTGCTCGGAATGGTGGGAGGAAAT

lcl|TC300086\_UP|Q9LLI4\_MAIZE (CesA6)\_\_\_ 3200 TTCCAATGCGCATCAACAACGGATATGAATCATGGGGCCCTGTTGGGAAGCTCTTCTT  
lcl|TC280752\_UP|Q9LLI2\_MAIZE (CesA8)\_\_\_ 3243 CTCGAACCGGATCAACAACGGCTACGGCTCCTGGGGCCCGCTTTCGGGAAGCTCTTCTT  
lcl|TC295737\_UP|Q6UDF1\_MAIZE (CesA10)\_\_\_ 3039 GTCCGACGCCGTCAACAACGGCTACGGCTCCTGGGGCCCGCTTTCGGGAAGCTCTTCTT  
lcl|TC287832\_UP|Q9LLI6\_MAIZE (CesA4)\_\_\_ 3302 CTCCTACGCCATCAACAGCGGATACCAGTCTGGGGCCCGCTTTCGGGAAGCTCTTCTT  
lcl|TC287831\_UP|Q9LLI1\_MAIZE (CesA9)\_\_\_ 3228 CTCCTACGCCATCAACAGCGGATACCAGTCTGGGGTCCGCTTTCGGGAAGCTCTTCTT  
lcl|TC299205\_UP|Q9LLI5\_MAIZE (CesA5)\_\_\_ 3192 TTCCTACCGAATCAAAAGCGCTACCAGTCAATGGGGACCTTTTCGGGAAGCTCTTCTT  
lcl|TC311277\_UP|Q9LLI8\_MAIZE (CesA2)\_\_\_ 3148 TTCGTATGCCATTAACAGCGGATACCAATCCTGGGGTCCGCTCTTTCGGGAAGCTCTTCTT  
lcl|TC294544\_UP|Q9LLI9\_MAIZE (CesA1)\_\_\_ 3156 TTCGTATGCCATTAACAGTGGCTACCAATCCTGGGGTCCGCTCTTTCGGGAAGCTCTTCTT

lcl|TC300086\_UP|Q9LLI4\_MAIZE (CesA6)\_\_\_ 3260 TGCATTTTGGGTGATCTGCCATCTTACCCGTTCTCAAGGGTCTGTTGGGAGGCAGAA  
lcl|TC280752\_UP|Q9LLI2\_MAIZE (CesA8)\_\_\_ 3303 CGCCTTCTGGGTGATCTGCCACCTGTACCCTTCTCAAGGGTCTGTTGGGAGGCAGAA  
lcl|TC295737\_UP|Q6UDF1\_MAIZE (CesA10)\_\_\_ 3099 CTCTTCTGGGTGATCTGCCACCTGTACCCTTCTCAAGGGTCTGTTGGGAGGCAGAA  
lcl|TC287832\_UP|Q9LLI6\_MAIZE (CesA4)\_\_\_ 3362 CGCCTTCTGGGTGATCTGCCACCTGTACCCTTCTCAAGGGTCTGTTGGGAGGCAGAA  
lcl|TC287831\_UP|Q9LLI1\_MAIZE (CesA9)\_\_\_ 3288 CGCCTTCTGGGTGATCTGCCACCTGTACCCTTCTCAAGGGTCTGTTGGGAGGCAGAA  
lcl|TC299205\_UP|Q9LLI5\_MAIZE (CesA5)\_\_\_ 3252 TCCGTTCTGGGTGATCTGCCACCTGTACCCTTCTCAAGGGTCTGTTGGGAGGCAGAA  
lcl|TC311277\_UP|Q9LLI8\_MAIZE (CesA2)\_\_\_ 3208 CTGATCTGGGTGATCTGCCATCTTACCCTTCTCAAGGGTCTGTTGGGAGGCAGAA  
lcl|TC294544\_UP|Q9LLI9\_MAIZE (CesA1)\_\_\_ 3216 CTGATCTGGGTGATCTGCCATCTTACCCTTCTCAAGGGTCTGTTGGGAGGCAGAA

lcl|TC300086\_UP|Q9LLI4\_MAIZE (CesA6)\_\_\_ 3320 CAGGACGCCAACGATTTGTCATTGTCTGGTCCATCCTCCTGGTTCGATCTTCTGCTGCT  
lcl|TC280752\_UP|Q9LLI2\_MAIZE (CesA8)\_\_\_ 3363 CAGGACGCCGACGATCTGTCATCTGCTGGTCCATCCTGCTGGCTCGATCTTCTGCTGCT  
lcl|TC295737\_UP|Q6UDF1\_MAIZE (CesA10)\_\_\_ 3159 CCGGACGCCAACCATCTGTCATCTGCTGGTCCATCCTGCTGGCTCGATCTTCTGCTGCT  
lcl|TC287832\_UP|Q9LLI6\_MAIZE (CesA4)\_\_\_ 3422 CCGCACCCGACCATCTGTCCTGCTGGTCCATCCTGCTGGGCTCATCTTCTCTGCT  
lcl|TC287831\_UP|Q9LLI1\_MAIZE (CesA9)\_\_\_ 3348 CCGCACCCGACCATCTGTCATCTGCTGGTCCATCCTGCTGGGCTCATCTTCTCTGCT  
lcl|TC299205\_UP|Q9LLI5\_MAIZE (CesA5)\_\_\_ 3312 CCGCACCCGACCATCTGTCATCTGCTGGTCCATCCTGCTGGGCTCATCTTCTCTGCT  
lcl|TC311277\_UP|Q9LLI8\_MAIZE (CesA2)\_\_\_ 3268 CCGCACCCGACCAATCTGTCATCTGCTGGTCCATCCTGCTGGGCTCATCTTCTCTGCT  
lcl|TC294544\_UP|Q9LLI9\_MAIZE (CesA1)\_\_\_ 3276 CCGCACCCGACCAATCTGTCATCTGCTGGTCCATCCTGCTGGGCTCATCTTCTCTGCT

lcl|TC300086\_UP|Q9LLI4\_MAIZE (CesA6)\_\_\_ 3380 TTGGGTCCGGATCGACCTTTCTTTCGANGSATTAAGG----TCCCTGTTGGAGGAST  
lcl|TC280752\_UP|Q9LLI2\_MAIZE (CesA8)\_\_\_ 3423 TTGGGTCCGCTCGACCCGTTCTCCTGCCAAGGCAAGG---CCGCTCCTGGAGGAGT  
lcl|TC295737\_UP|Q6UDF1\_MAIZE (CesA10)\_\_\_ 3219 TTGGGTCCGGATCGACCTTTATCCGANGGCTAAGG---CCGCTCCTCAAGCCAT  
lcl|TC287832\_UP|Q9LLI6\_MAIZE (CesA4)\_\_\_ 3482 TTGGGTCCGATCGACCCCTTACCACCCCGCTCACTGG---CCGGATACCCGAGCGT  
lcl|TC287831\_UP|Q9LLI1\_MAIZE (CesA9)\_\_\_ 3408 TTGGGTCCGATCGATCCGTTACCACCCCGCTCACTGG---CCGGATACCTCGAACCT  
lcl|TC299205\_UP|Q9LLI5\_MAIZE (CesA5)\_\_\_ 3372 TTGGGTCCGATCGATCCATTCACCAACCGGCTCACTGG---TCTGATATCCGAAAT  
lcl|TC311277\_UP|Q9LLI8\_MAIZE (CesA2)\_\_\_ 3328 TTGGGTGAGATCGATCCCTTTCATCTCC--CGACACGAAAGCTGCGCTTGGGGCAAT  
lcl|TC294544\_UP|Q9LLI9\_MAIZE (CesA1)\_\_\_ 3336 TTGGGTGAGATCGATCCCTTTCATCTCC--CGACACGAAAGCTGCTGCTTGGGGCAAT

lcl|TC300086\_UP|Q9LLI4\_MAIZE (CesA6)\_\_\_ 3436 TTGGGTCCGGATCGACCTTTCTTTCGANGSATTAAGG----TCCCTGTTGGAGGAST  
lcl|TC280752\_UP|Q9LLI2\_MAIZE (CesA8)\_\_\_ 3479 TTGGGTCCGCTCGACCCGTTCTCCTGCCAAGGCAAGG---CCGCTCCTGGAGGAGT  
lcl|TC295737\_UP|Q6UDF1\_MAIZE (CesA10)\_\_\_ 3275 TTGGGTCCGGATCGACCTTTATCCGANGGCTAAGG---CCGCTCCTCAAGCCAT  
lcl|TC287832\_UP|Q9LLI6\_MAIZE (CesA4)\_\_\_ 3538 TTGGGTCCGATCGACCCCTTACCACCCCGCTCACTGG---CCGGATACCCGAGCGT  
lcl|TC287831\_UP|Q9LLI1\_MAIZE (CesA9)\_\_\_ 3464 TTGGGTCCGATCGATCCGTTACCACCCCGCTCACTGG---CCGGATACCTCGAACCT  
lcl|TC299205\_UP|Q9LLI5\_MAIZE (CesA5)\_\_\_ 3428 TTGGGTCCGATCGATCCATTCACCAACCGGCTCACTGG---TCTGATATCCGAAAT  
lcl|TC311277\_UP|Q9LLI8\_MAIZE (CesA2)\_\_\_ 3387 TTGGGTGAGATCGATCCCTTTCATCTCC--CGACACGAAAGCTGCGCTTGGGGCAAT  
lcl|TC294544\_UP|Q9LLI9\_MAIZE (CesA1)\_\_\_ 3395 TTGGGTGAGATCGATCCCTTTCATCTCC--CGACACGAAAGCTGCTGCTTGGGGCAAT

```

lcl|TC300086_UP|Q9LLI4_MAIZE (CesA6)___ 3487 GTGGTCGACGAGGATATTTTTCAGATGTTTTGTCGCCATATTTCTTTT-TTCATTTT
lcl|TC280752_UP|Q9LLI2_MAIZE (CesA8)___ 3525 TCTGTACAGCGCCAAATTACGCCTGATTTTGT---TGTGTGTGTGT-TGGATTC
lcl|TC295737_UP|Q6UDF1_MAIZE (CesA10)___ 3327 GCCGCGGTGGTTTGGACATACAGCCACTTTGGGCCAGGCTACTCATCTCGACTTTT
lcl|TC287832_UP|Q9LLI6_MAIZE (CesA4)___ 3597 CGATGCTCTGTTTCTGTTAAGTTTATATATAAGC-----AGCAAGTGGCGTTAT
lcl|TC287831_UP|Q9LLI1_MAIZE (CesA9)___ 3516 CGAATGTCCGCTGCC--ACAATTTCTGTTASTAA-TTATATAGGCAGTGGCGTTAT
lcl|TC299205_UP|Q9LLI5_MAIZE (CesA5)___ 3486 TGCATCGTAGTATACAGTGGTGGCTCTTTTATACAT----GGTAGG-AACTTSet
lcl|TC311277_UP|Q9LLI8_MAIZE (CesA2)___ 3447 GCCCCTCTGTAAATACCTGAGGGGCTAGATGGGAATT---TTTGTGTAGATGAGGA
lcl|TC294544_UP|Q9LLI9_MAIZE (CesA1)___ 3454 GCCCCTCTGTAAATACCTGAGGAGCTAGATGGGAATTTTGTGTAGGTGAGCA

lcl|TC300086_UP|Q9LLI4_MAIZE (CesA6)___ 3546 TGTCCTCTGTACATAGAAACAGCGCAGAGGGGAAAAGGTACTTGTATTTCTTTG
lcl|TC280752_UP|Q9LLI2_MAIZE (CesA8)___ 3581 G-----CTGTACATAGAAACACATCTCCACGGCATCTCTGCTGTCCATTCGAGCAG
lcl|TC295737_UP|Q6UDF1_MAIZE (CesA10)___ 3387 T-----TTTAAATTTGTACAGATTTGTSATCGAGTCACTGAGTGACAGAGTGTG
lcl|TC287832_UP|Q9LLI6_MAIZE (CesA4)___ 3651 TTACAGCTACGTACAGCCAGTGGATATT--GTTTACACAAAGTTTAA--CTTGTGTTA
lcl|TC287831_UP|Q9LLI1_MAIZE (CesA9)___ 3574 TTACAGCTACGTACACACAGGGGATACTCCGTTTATCACTGGTGTGCTTTGTGTTG
lcl|TC299205_UP|Q9LLI5_MAIZE (CesA5)___ 3540 CGGGAG--ACGTTAATACATATGCTATATSTACCTCCGCTGGTCTTTATCCGTAAGTTA
lcl|TC311277_UP|Q9LLI8_MAIZE (CesA2)___ 3505 TGG----ATCTGCATCCAAGTTATGCCCTCTGTTTATAGCTTCTTCGGTCCGGTCCG
lcl|TC294544_UP|Q9LLI9_MAIZE (CesA1)___ 3514 TGG----ATTTCGAT--AAGTTATGTCCTCTTTCATTAGCTTCTTCCGTGCCGGTCCG

lcl|TC300086_UP|Q9LLI4_MAIZE (CesA6)___ 3606 TTCCATGGTGGTGGTGGTGGCGGCTCAGCCTCCTGAGTGCAGTATTCGGCAA----
lcl|TC280752_UP|Q9LLI2_MAIZE (CesA8)___ 3635 CAGACAGGTGCCTCTCTCTTTGTTGAGTAAATTAAGTTTAAAGTTATACAGT---
lcl|TC295737_UP|Q6UDF1_MAIZE (CesA10)___ 3440 C-GTCTAAGAACTGTGATGGAAT-TCACTCAAAATTAATGGACATTTTCTTCTCA---
lcl|TC287832_UP|Q9LLI6_MAIZE (CesA4)___ 3707 ATATCCATTTCTTTGTGATATAAT--TTATACTTTGTGGAGAG-TGGCTGACA-----
lcl|TC287831_UP|Q9LLI1_MAIZE (CesA9)___ 3634 ATATAAGTTACTTATATACCTATGCTTCTACTTTGTGGAGAG-TGGCTGACA-----
lcl|TC299205_UP|Q9LLI5_MAIZE (CesA5)___ 3598 ATATATATACTGCTTTACAGAAATTAATGATGGGCAACAGGTTCT--TACTTGTATTTGT--
lcl|TC311277_UP|Q9LLI8_MAIZE (CesA2)___ 3560 CTGCAGAC----AATCATGGAGCCTTTCTACCTTGGTGTGTGTGGCCAGCASCCTAA
lcl|TC294544_UP|Q9LLI9_MAIZE (CesA1)___ 3567 CTGCAGAC--AAGAATCAGGAGCCTTTCTACCTTCCATGTAGCCAGCCAGCASCCTAA

lcl|TC300086_UP|Q9LLI4_MAIZE (CesA6)___ 3662 --ACGGAGGCTCGGGCAACCTTGTCCAGTTCGCCACGAAATATACTAGGGAAGATCCGG
lcl|TC280752_UP|Q9LLI2_MAIZE (CesA8)___ 3692 --GATGCACATTCAGATG-CCCAGTCTAT---CCCTTTTACAGTCTTATATTAACCG
lcl|TC295737_UP|Q6UDF1_MAIZE (CesA10)___ 3494 --ACTGC
lcl|TC287832_UP|Q9LLI6_MAIZE (CesA4)___ 3758 -G-ACGAGTTTGTATGCTACGAAACAA-AGAAATTAGTTCCATTTCTTTC-----
lcl|TC287831_UP|Q9LLI1_MAIZE (CesA9)___ 3687 -GGACAGTTTCTTATGTTATGACAGCAA-AGAAATAGTTA-TTTCATAC-----
lcl|TC299205_UP|Q9LLI5_MAIZE (CesA5)___ 3655 -GTGTACATATTAAATGCTCTCCCAATAAGAGGAATTT-----
lcl|TC311277_UP|Q9LLI8_MAIZE (CesA2)___ 3616 ATTTGGAATTCGCATTTT-TTATACGTTGCTTTATTGTTTTAGAGTAAATATCATTT
lcl|TC294544_UP|Q9LLI9_MAIZE (CesA1)___ 3627 GNTTGAATTTGAAGTTTGTATCCGTCACATTTATTGTTTTAGAGTAAATATCATTT

lcl|TC300086_UP|Q9LLI4_MAIZE (CesA6)___ 3720 ACCAATCATCAATCGATCACCGACTTCTATTTGTTTC---AGCATTCCTTATTAGTTTTGG
lcl|TC280752_UP|Q9LLI2_MAIZE (CesA8)___ 3745 ACAAAAGCATATTTGGTTAG--GACTTTTATTTCTTTGTAGCAATTTGTTCCCGCCCCCCC
lcl|TC295737_UP|Q6UDF1_MAIZE (CesA10)___ -----
lcl|TC287832_UP|Q9LLI6_MAIZE (CesA4)___ -----
lcl|TC287831_UP|Q9LLI1_MAIZE (CesA9)___ -----
lcl|TC299205_UP|Q9LLI5_MAIZE (CesA5)___ -----
lcl|TC311277_UP|Q9LLI8_MAIZE (CesA2)___ 3675 TGTTTGAGTAACTATTCACACGAACT--ATAT--GGCAATCTGTATTATATACGCAAGA
lcl|TC294544_UP|Q9LLI9_MAIZE (CesA1)___ 3687 TGTTTGTGGAACTGTTCCACACGACTTATATTGGCAATCTGTATTATATACCAAGA

lcl|TC300086_UP|Q9LLI4_MAIZE (CesA6)___ 3777 TGGGTGGAATCTTCATCCGTTAGCCCAACAGA-CACTTGTTTTGTAGTATGATTGCTCT
lcl|TC280752_UP|Q9LLI2_MAIZE (CesA8)___ 3803 ACTGTTGTTGTAATAATCCGCCAATCCGCCAAGAACCGGTTGGGGCGCTCTAGCTTT
lcl|TC295737_UP|Q6UDF1_MAIZE (CesA10)___ -----
lcl|TC287832_UP|Q9LLI6_MAIZE (CesA4)___ -----
lcl|TC287831_UP|Q9LLI1_MAIZE (CesA9)___ -----
lcl|TC299205_UP|Q9LLI5_MAIZE (CesA5)___ -----
lcl|TC311277_UP|Q9LLI8_MAIZE (CesA2)___ 3733 CTGATACATCTCTCGATTGTGAGCAACACTCAGAACACTGTAATCTCTTAGGACAAC
lcl|TC294544_UP|Q9LLI9_MAIZE (CesA1)___ 3747 CTC---CATTTTTCGAAGGGGAGCAACAATCAGAACCCGTAATTTATTAGCCCAACT

lcl|TC300086_UP|Q9LLI4_MAIZE (CesA6)___ 3836 GCATCTGCAAAGTTGTTG--TTGTGATCCGCTGCTCAATGAGGCGAGGGTGGAACTGG
lcl|TC280752_UP|Q9LLI2_MAIZE (CesA8)___ 3863 GTGATCATATAGAAAACGACTTGGTGTGTTTTGGACATTTGGAATGAAGGAAGGA-TGA
lcl|TC295737_UP|Q6UDF1_MAIZE (CesA10)___ -----
lcl|TC287832_UP|Q9LLI6_MAIZE (CesA4)___ -----
lcl|TC287831_UP|Q9LLI1_MAIZE (CesA9)___ -----
lcl|TC299205_UP|Q9LLI5_MAIZE (CesA5)___ -----
lcl|TC311277_UP|Q9LLI8_MAIZE (CesA2)___ 3793 ATGTAAGGAGCTGTTGTATCATCTCTATTGTTTCTAATGGCCGAGGATATGTAGATGT
lcl|TC294544_UP|Q9LLI9_MAIZE (CesA1)___ 3804 -----

```

**Figure 1S.** Alignment (ClustalW) of 8 full-length *CesA* cDNAs (ZmGI) expressed in maize ovaries. The full-length sequences share up to 94% identity, but are divergent in their 3'UTRs (Holland et al., 2000). The 3'-anchored consensus sequences identified in the 2-sample multiplex library are highlighted in red. Where transcript variants were identified (*CesA4* and *CesA6*), the most highly represented variant is shown. Only a partial EST sequence is available for *CesA3* and is not included in the alignment. All *CesA* 3'-anchored sequences identified are listed in Table 2S.
