# Supplementary material
Source: PubMed Central journal article supplement (PMC2230554)
Supplement: plntphys_pp.107.108597_2.pdf [file plntphys_pp.107.108597_2.pdf]

**Figure S2.** Confirmation of SNPs in W22 3'-anchored sequence reads versus B73 genomic sequence and in homopolymer runs

**A TC298173: Histone 3 (*O. sativa*)**

|           |                                                                                                            |                |
|-----------|------------------------------------------------------------------------------------------------------------|----------------|
| CAT1      | CGGCCCCAGTGGCGCGGAGGGAT- GGAGGAGGCAATTTGTAACCTTATTATGCTGTTTGTTCGTTTTAGACGGCGTGGGAAGAA-CTAGTGTAAAAACGGCTTTA | AAGTCTATTTTGTG |
| CAT2      | CGGCCCCAGTGGCGCGGAGGGAT- GGAGGAGGCAATTTGTAACCTTATTATGCTGTTTGTTCGTTTTAGACGGCGTGGGAAGAA-CTAGTGTAAAAACGGCTTTA | AAGTCTATTTTGTG |
| CAT3      | CGGCCCCAGTGGCGCGGAGGGAT- GGAGGAGGCAATTTGTAACCTTATTATGCTGTTTGTTCGTTTTAGACGGCGTGGGAAGAA-CTAGTGTAAAAACGGCTTTA | AAGTCTATTTTGTG |
| CAT4      | CGGCCCCAGTGGCGCGGAGGGAT- GGAGGAGGCAATTTGTAACCTTATTATGCTGTTTGTTCGTTTTAGACGGCGTGGGAAGAA-CTAGTGTAAAAACGGCTTTA | AAGTCTATTTTGTG |
| CAT5      | CGGCCCCAGTGGCGCGGAGGGAT- GGAGGAGGCAATTTGTAACCTTATTATGCTGTTTGTTCGTTTTAGACGGCGTGGGAAGAA-CTAGTGTAAAAACGGCTTTA | AAGTCTATTTTGTG |
| CAT6      | CGGCCCCAGTGGCGCGGAGGGAT- GGAGGAGGCAATTTGTAACCTTATTATGCTGTTTGTTCGTTTTAGACGGCGTGGGAAGAA-CTAGTGTAAAAACGGCTTTA | AAGTCTATTTTGTG |
| CAT7      | CGGCCCCAGTGGCGCGGAGGGAT- GGAGGAGGCAATTTGTAACCTTATTATGCTGTTTGTTCGTTTTAGACGGCGTGGGAAGAA-CTAGTGTAAAAACGGCTTTA | AAGTCTATTTTGTG |
| CAT8      | CGGCCCCAGTGGCGCGGAGGGAT- GGAGGAGGCAATTTGTAACCTTATTATGCTGTTTGTTCGTTTTAGACGGCGTGGGAAGAA-CTAGTGTAAAAACGGCTTTA | AAGTCTATTTTGTG |
| CAT9      | CGGCCCCAGTGGCGCGGAGGGAT- GGAGGAGGCAATTTGTAACCTTATTATGCTGTTTGTTCGTTTTAGACGGCGTGGGAAGAA-CTAGTGTAAAAACGGCTTTA | AAGTCTATTTTGTG |
| CAT10     | CGGCCCCAGTGGCGCGGAGGGAT- GGAGGAGGCAATTTGTAACCTTATTATGCTGTTTGTTCGTTTTAGACGGCGTGGGAAGAA-CTAGTGTAAAAACGGCTTTA | AAGTCTATTTTGTG |
| CAT11     | CGGCCCCAGTGGCGCGGAGGGAT- GGAGGAGGCAATTTGTAACCTTATTATGCTGTTTGTTCGTTTTAGACGGCGTGGGAAGAA-CTAGTGTAAAAACGGCTTTA | AAGTCTATTTTGTG |
| CAT12     | CGGCCCCAGTGGCGCGGAGGGAT- GGAGGAGGCAATTTGTAACCTTATTATGCTGTTTGTTCGTTTTAGACGGCGTGGGAAGAA-CTAGTGTAAAAACGGCTTTA | AAGTCTATTTTGTG |
| CAT13     | CGGCCCCAGTGGCGCGGAGGGAT- GGAGGAGGCAATTTGTAACCTTATTATGCTGTTTGTTCGTTTTAGACGGCGTGGGAAGAA-CTAGTGTAAAAACGGCTTTA | AAGTCTATTTTGTG |
| ACT1      | CGGCCCCAGTGGCGCGGAGGGAT- GGAGGAGGCAATTTGTAACCTTATTATGCTGTTTGTTCGTTTTAGACGGCGTGGGAAGAA-CTAGTGTAAAAACGGCTTTA | AAGTCTATTTTGTG |
| ACT2      | CGGCCCCAGTGGCGCGGAGGGAT- GGAGGAGGCAATTTGTAACCTTATTATGCTGTTTGTTCGTTTTAGACGGCGTGGGAAGAA-CTAGTGTAAAAACGGCTTTA | AAGTCTATTTTGTG |
| ACT3      | CGGCCCCAGTGGCGCGGAGGGAT- GGAGGAGGCAATTTGTAACCTTATTATGCTGTTTGTTCGTTTTAGACGGCGTGGGAAGAA-CTAGTGTAAAAACGGCTTTA | AAGTCTATTTTGTG |
| ACT4      | CGGCCCCAGTGGCGCGGAGGGAT- GGAGGAGGCAATTTGTAACCTTATTATGCTGTTTGTTCGTTTTAGACGGCGTGGGAAGAA-CTAGTGTAAAAACGGCTTTA | AAGTCTATTTTGTG |
| consensus |                                                                                                            |                |
| W22       | CGGCCCCAGTGGCGCGGAGGGAT- GGAGGAGGCAATTTGTAACCTTATTATGCTGTTTGTTCGTTTTAGACGGCGTGGGAAGAA-CTAGTGTAAAAACGGCTTTA | AAGTCTATTTTGTG |
| B73       | CGGCCCCAGTGGCGCGGAGGGAT- GGAGGAGGCAATTTGTAACCTTATTATGCTGTTTGTTCGTTTTAGACGGCGTGGGAAGAA-CTAGTGTAAAAACGGCTTTA | AAGTCTATTTTGTG |

\* \* \* \*

  

**B NCBI UniGene 2567165: heavy-metal-associated (*O. sativa*)**

|           |                                                                                                  |
|-----------|--------------------------------------------------------------------------------------------------|
| CAT1      | CGGTTTCATGT-AGATGTAGTGTGCGTTTTGATTTTGTGAAAAAATAAA-CCAGTTTGTAAACGGTAGACCACCTTGTGCAAACATGATCAGAAAA |
| CAT2      | CGGTTTCATGT-AGATGTAGTGTGCGTTTTGATTTTGTGAAAAAATAAA-CCAGTTTGTAAACGGTAGACCACCTTGTGCAAACATGATCAGAAAA |
| CAT3      | CGGTTTCATGT-AGATGTAGTGTGCGTTTTGATTTTGTGAAAAAATAAA-CCAGTTTGTAAACGGTAGACCACCTTGTGCAAACATGATCAGAAAA |
| CAT4      | CGGTTTCATGT-AGATGTAGTGTGCGTTTTGATTTTGTGAAAAAATAAA-CCAGTTTGTAAACGGTAGACCACCTTGTGCAAACATGATCAGAAAA |
| CAT5      | CGGTTTCATGT-AGATGTAGTGTGCGTTTTGATTTTGTGAAAAAATAAA-CCAGTTTGTAAACGGTAGACCACCTTGTGCAAACATGATCAGAAAA |
| CAT6      | CGGTTTCATGT-AGATGTAGTGTGCGTTTTGATTTTGTGAAAAAATAAA-CCAGTTTGTAAACGGTAGACCACCTTGTGCAAACATGATCAGAAAA |
| CAT7      | CGGTTTCATGT-AGATGTAGTGTGCGTTTTGATTTTGTGAAAAAATAAA-CCAGTTTGTAAACGGTAGACCACCTTGTGCAAACATGATCAGAAAA |
| ACT1      | CGGTTTCATGT-AGATGTAGTGTGCGTTTTGATTTTGTGAAAAAATAAA-CCAGTTTGTAAACGGTAGACCACCTTGTGCAAACATGATCAGAAAA |
| consensus |                                                                                                  |
| W22       | CGGTTTCATGT-AGATGTAGTGTGCGTTTTGATTTTGTGAAAAAATAAA-CCAGTTTGTAAACGGTAGACCACCTTGTGCAAACATGATCAGAAAA |
| B73       | CGGTTTCATGT-AGATGTAGTGTGCGTTTTGATTTTGTGAAAAAATAAA-CCAGTTTGTAAACGGTAGACCACCTTGTGCAAACATGATCAGAAAA |

\*

  

**C NCBI UniGene 514900: At1g74950 (*A. thaliana*)**

|           |                                                                                                                 |
|-----------|-----------------------------------------------------------------------------------------------------------------|
| CAT1      | CGG- GGCGATTTGATTGGCTGGGTTCTGGCTTC- TTTGGGCT- GCTGGATTGGGGTTGGTGTGGAGATCGGAGACGGAGGATTGTAGAAACGATTCTTGT- CT     |
| CAT2      | CGG- GGCGATTTGATTGGCTGGGTTCTGGCTTC- TTTGGGCT- GCTGGATTGGGGTTGGTGTGGAGATCGGAGACGGAGGATTGTAGAAACGATTCTTGT- CT     |
| CAT3      | CGG- GGCGATTTGATTGGCTGGGTTCTGGCTTC- TTTGGGCT- GCTGGATTGGGGTTGGTGTGGAGATCGGAGACGGAGGATTGTAGAAACGATTCTTGT- C      |
| CAT4      | CGG- AGGCGATTTGATTGGCTGGGTTCTGGCTTC- TTTGGGCT- GCTGGATTGGGGTTGGTGTGGAGATCGGAGACGGAGGATTGTAGAAACGATTCTTGT- C     |
| CAT5      | CGG- GGCGATTTGATTGGCTGGGTTCTGGCTTC- TTTGGGCT- GCTGGATTGGGGTTGGTGTGGAGATCGGAGACGGAGGATTGTAGAAACGATTCTTGT- CT     |
| CAT6      | CGG- GGCGATTTGATTGGCTGGGTTCTGGCTTC- TTTGGGCT- GCTGGATTGGGGTTGGTGTGGAGATCGGAGACGGAGGATTGTAGAAACGATTCTTGT- C-CT   |
| ACT1      | CGG- GGCGATTTGATTGGCTGGGTTCTGGCTTC- TTTGGGCT- GCTGGATTGGGGTTGGTGTGGAGATCGGAGACGGAGGATTGTAGAAACGATTCTTGT- - CTCT |
| ACT2      | CGG- GGCGATTTGATTGGCTGGGTTCTGGCTTC- TTTGGGCT- GCTGGATTGGGGTTGGTGTGGAGATCGGAGACGGAGGATTGTAGAAACGATTCTTGT- CTCT   |
| ACT3      | CGG- GGCGATTTGATTGGCTGGGTTCTGGCTTC- TTTGGGCT- GCTGGATTGGGGTTGGTGTGGAGATCGGAGACGGAGGATTGTAGAAACGATTCTTGT- CTCT   |
| consensus |                                                                                                                 |
| W22       | CGG- GGCGATTTGATTGGCTGGGTTCTGGCTTC- TTTGGGCT- GCTGGATTGGGGTTGGTGTGGAGATCGGAGACGGAGGATTGTAGAAACGATTCTTGT- CTCT   |
| B73       | CGG- GGCGATTTGATTGGCTGGGTTCTGGCTTC- TTTGGGCT- GCTGGATTGGGGTTGGTGTGGAGATCGGAGACGGAGGATTGTAGAAACGATTCTTGT- CTCT   |

\* \* \* ^

**Figure S2.** A, A CAP3 assembly of 17 *Histone 3* reads from the two, multiplexed, W22, 454 sub-libraries (ACT, CAT keys). The 5 SNPs (highlighted) that distinguish the W22 allele were confirmed by independent W22 ESTs. B, A SNP embedded in a homopolymer tract of a putative *HMA* mRNA is detected. An adjacent 8 bp run of A's yields the correct consensus. C, A unique transcript annotated as "unknown function" includes 4 putative SNPs: 3 (\* highlighted) have independent cDNA support, the 4<sup>th</sup> (^ highlighted) is most likely an error due to under-estimation of the 8mer run of T. Trimmed reads from combined sub-libraries were assembled using CAP3 (p=90). Polymorphisms were confirmed by BLASTN of the Industry Unigene cDNAs and public ESTs.
