# Supplementary material
Source: PubMed Central journal article supplement (PMC2230554)
Supplement: plntphys_pp.107.108597_3.pdf [file plntphys_pp.107.108597_3.pdf]

**Table S1.** Distribution of consensus sequences by number of reads

| <b>Read frequency</b> | <b># consensus tags<sup>a</sup></b> |
|-----------------------|-------------------------------------|
| 2                     | 3940                                |
| 3                     | 2020                                |
| 4                     | 1328                                |
| 5                     | 924                                 |
| 6-10                  | 2833                                |
| 11-100                | 3563                                |
| 101-1000              | 212                                 |
| >1001                 | 2                                   |

<sup>a</sup>Number of consensus sequences (total of 14,822) represented by the associated read count in the 2-sample multiplexed library.
