# Supplementary material
Source: PubMed Central journal article supplement (PMC2230554)
Supplement: plntphys_pp.107.108597_4.pdf [file plntphys_pp.107.108597_4.pdf]

**Table S2.** 3'-anchored sequences for *CesA* gene family transcripts

|                     | <b>3'-anchored consensus sequence</b>                                                                                         | <b>Read #</b> | <b>% Match</b> |
|---------------------|-------------------------------------------------------------------------------------------------------------------------------|---------------|----------------|
| CesA6a              | CGGAGGCTGCGGCAACCTTGTGCAGTTCGGCCACGAATATACTAGGGAAGATCGCGACCAA<br>TCAATCAATCGATGACCGAGTTCAATTGTTCAAAG                          | 26            | 100 (93)       |
| CesA6b <sup>a</sup> | CGGATCGACCCTTTCTTGCGAAGGATGATGGTCCCCTGTTGGAGGAGTGTGGTCTGGATTG<br>CAACTAGGAGGTGAGCAGTGGACCTTCCCCTNAGTGTGTGG                    | 9             | 97 (104)       |
| CesA8               | CGGGATCTCGAACGCGATCAACAACGGGTACGAGTCGTGGGGCCCCCTGTTCCGGGAAGCTC<br>TTCTTCGCCTTCTGGGTGATCGTCCACCTGTACCCGTTCCCTCAAGGGTCTGGGTGGGG | 8             | 100 (113)      |
| CesA10              | CGGACGCCACCATCGTCGTGCTCTGGTCCATCCTCTCGCTCCATCTTCTCGCTCGTCTG<br>GGTCAGGATCGACCCGTTTATCCCGAAGGCCAAGGGCCCCAT                     | 2             | 100 (104)      |
| CesA4a              | CGGATACCCAGACGTGTGGCATCAACTGCTAGGGAAGTGAAGGTTTGTACTTTGTAGAAAC<br>GGAGGAATACCACGTGCCATCTGTTGTCTGTTAAGTTATATAT                  | 5             | 100 (106)      |
| CesA4b <sup>b</sup> | CGGATACCCAGACGTGTGGCATCAACTGCTAGGGAAGTGAAGGTTTGTACTTTGTAGAAAC<br>GGAGGAATACCACGTGCCATCTGTTGTCTGTTAAGTTATATA                   | 2             | 95 (107)       |
| CesA4c <sup>c</sup> | CGGGGTGTTGGTGTATTTGATGCATCAACTGATTACAACATGGAAGATGCCTTATTGTGAGTT<br>CCAACACCCTCTCAGCTCACTCAATTTG                               | 2             | 100 (57)       |
| CesA9               | CGGATACTCGAACGTGTGGCATCAACTGCTAGGGAGGTGAAGGTTTGTAGAACAGAGAGAT<br>ACCACGAATGTGCCGCTGCCACAAATTGCTGTAAAG                         | 10            | 100 (98)       |
| CesA5               | CGGGTCACTGGCCCTGATATCGCGAAATGTGGCATCAACTGCTAGGATGAGCTGAATATAGT<br>TAAAGAGTGAAGTAGACGCATTGTGG                                  | 27            | 96 (88)        |
| CesA2               | CGGTGCTGCTGCAGACAATCATGGAGCCTTTCTACCTTGCTTGTAGTGTGGCCAGCAGCGT<br>AAATTGTGAATTCTGCTTATTTTTTTAG                                 | 14            | 100 (78)       |
| CesA1               | CGGTGCTGCTGCGGACTAAGAATCACGGAGCCTTTCTACCTTCCATGTAGCGCCAGCCAGCA<br>GCGTAAGATGTGTAATTTTGAAGTTTTGTATGTC                          | 18            | 97 (96)        |
| CesA3 <sup>d</sup>  | CGGCACAATCATGATCTACCCCTTCGTGAAATACCAGAGGTTAGGCAAGACTTTTCTTGGTA<br>GGTGCGAAGATGTGTCGTTAAGTTCACTCTACTGCTAGTTTGGGGG              | 17            | 100 (100)      |

<sup>a</sup>*CesA6b* reads are located upstream of the *CesA6a* consensus tag, consistent with a transcript containing a restriction site polymorphism. However, absence of the downstream *Msp1* site was not independently confirmed. <sup>b</sup>*CesA4b* contains 3 indel polymorphisms in comparison to *CesA4a* and all 3 are represented in both reads. <sup>c</sup>*CesA4c* aligns with a different genomic assembly than *CesA4a* and *CesA4b*. The *CesA4c* sequence contained part of an adjacent intron (highlighted in grey) identified in the MAGI4\_30120 sequence. <sup>d</sup>*CesA3* aligns to a partial fragment and thus is not represented in the alignment.
