# Supplementary material
Source: PubMed Central journal article supplement (PMC2230554)
Supplement: plntphys_pp.107.108597_5.pdf [file plntphys_pp.107.108597_5.pdf]

---

**Table S3.** Polymorphisms detected by W22 3'-anchored 454-sequence-reads

---

|                                              |                          |
|----------------------------------------------|--------------------------|
| Consensus tags with 2 to 75 reads (n = 1263) |                          |
| Total polymorphic W22 alleles                | 56.6%                    |
| B73 MAGI Matches <sup>1</sup>                | 92.4%                    |
| Consensus tags with 7 to 75 reads (n=107)    |                          |
| Total polymorphic W22 alleles                | 52                       |
| # confirmed                                  | 47 (43.9%) <sup>‡</sup>  |
| Total polymorphisms                          | 146*                     |
| # confirmed                                  | 137 (93.8%) <sup>‡</sup> |
| Consensus tags with 5 to 75 reads (n=211)    |                          |
| Total polymorphisms                          | 257*                     |
| # confirmed                                  | 231 (89.9%) <sup>‡</sup> |
| Homopolymer-type polymorphisms               | 60*                      |
| # confirmed                                  | 53 (88.8%) <sup>‡</sup>  |

---

<sup>1</sup> Contiguous BLASTN alignment of >50 bp or > 90% of query length.

\* Percent of matches having one or more SNP or indel polymorphism within the best aligned segment.

<sup>‡</sup> Allele sequences supported by identity to independent EST sequences.
